# Supplementary material for: Lipophilic Re(CO)3pyca complexes for Mid-IR imaging applications
Source: Royal Society of Chemistry journal article supplement (doi:10.1039/d0dt03743e), 2020-12-11
Supplement: d0dt03743e1.pdf [file d0dt03743e1.pdf]

# Lipophilic $\text{Re}(\text{CO})_3\text{Pyca}$ Complexes for Mid-IR Imaging Applications

Briana R. Schrage,<sup>a</sup> Baylee R. Frisinger,<sup>a</sup> Sarah J. Schmidtke Sobeck<sup>b</sup> and Christopher J. Ziegler<sup>\*a</sup>

*a Department of Chemistry, University of Akron, Akron, Ohio 44312-3601, United States*

*b Department of Chemistry, College of Wooster, Wooster, Ohio 44691, United States*

## Supplementary Information

## Table of Contents

|                                                                                                  | Page |
|--------------------------------------------------------------------------------------------------|------|
| <b>Figure S1:</b> $^1\text{H}$ NMR (300 MHz) of <b>1a</b> in $\text{CDCl}_3$ .                   | S5   |
| <b>Figure S2:</b> $^1\text{H}$ NMR (300 MHz) of <b>1b</b> in $\text{CDCl}_3$ .                   | S6   |
| <b>Figure S3:</b> $^1\text{H}$ NMR (300 MHz) of <b>2a</b> in $\text{CDCl}_3$ .                   | S7   |
| <b>Figure S4:</b> $^1\text{H}$ NMR (300 MHz) of <b>2b</b> in $\text{CDCl}_3$ .                   | S8   |
| <b>Figure S5:</b> $^1\text{H}$ NMR (300 MHz) of <b>3a</b> in $\text{CDCl}_3$ .                   | S9   |
| <b>Figure S6:</b> $^1\text{H}$ NMR (300 MHz) of <b>3b</b> in $\text{CDCl}_3$ .                   | S10  |
| <b>Figure S7:</b> $^1\text{H}$ NMR (300 MHz) of <b>4a</b> in $\text{CDCl}_3$ .                   | S11  |
| <b>Figure S8:</b> $^1\text{H}$ NMR (300 MHz) of <b>4b</b> in $\text{CDCl}_3$ .                   | S12  |
| <b>Figure S9:</b> $^1\text{H}$ NMR (300 MHz) of <b>5a</b> in $\text{CDCl}_3$ .                   | S13  |
| <b>Figure S10:</b> $^1\text{H}$ NMR (300 MHz) of <b>5b</b> in $\text{CDCl}_3$ .                  | S14  |
| <b>Figure S11:</b> $^{13}\text{C}\{^1\text{H}\}$ NMR (125 MHz) of <b>1a</b> in $\text{CDCl}_3$ . | S15  |
| <b>Figure S12:</b> $^{13}\text{C}\{^1\text{H}\}$ NMR (125 MHz) of <b>1b</b> in $\text{CDCl}_3$ . | S16  |
| <b>Figure S13:</b> $^{13}\text{C}\{^1\text{H}\}$ NMR (125 MHz) of <b>2a</b> in $\text{CDCl}_3$ . | S17  |
| <b>Figure S14:</b> $^{13}\text{C}\{^1\text{H}\}$ NMR (125 MHz) of <b>2b</b> in $\text{CDCl}_3$ . | S18  |
| <b>Figure S15:</b> $^{13}\text{C}\{^1\text{H}\}$ NMR (125 MHz) of <b>3a</b> in $\text{CDCl}_3$ . | S19  |
| <b>Figure S16:</b> $^{13}\text{C}\{^1\text{H}\}$ NMR (125 MHz) of <b>3b</b> in $\text{CDCl}_3$ . | S20  |
| <b>Figure S17:</b> $^{13}\text{C}\{^1\text{H}\}$ NMR (125 MHz) of <b>4a</b> in $\text{CDCl}_3$ . | S21  |
| <b>Figure S18:</b> $^{13}\text{C}\{^1\text{H}\}$ NMR (125 MHz) of <b>4b</b> in $\text{CDCl}_3$ . | S22  |
| <b>Figure S19:</b> $^{13}\text{C}\{^1\text{H}\}$ NMR (125 MHz) of <b>5a</b> in $\text{CDCl}_3$ . | S23  |
| <b>Figure S20:</b> $^{13}\text{C}\{^1\text{H}\}$ NMR (125 MHz) of <b>5b</b> in $\text{CDCl}_3$ . | S24  |
| <b>Figure S21:</b> High-resolution ESI mass spectra of <b>1a</b> .                               | S25  |
| <b>Figure S22:</b> High-resolution ESI mass spectra of <b>1b</b> .                               | S26  |
| <b>Figure S23:</b> High-resolution ESI mass spectra of <b>2a</b> .                               | S27  |
| <b>Figure S24:</b> High-resolution ESI mass spectra of <b>2b</b> .                               | S28  |
| <b>Figure S25:</b> High-resolution ESI mass spectra of <b>3a</b> .                               | S29  |
| <b>Figure S26:</b> High-resolution ESI mass spectra of <b>3b</b> .                               | S30  |
| <b>Figure S27:</b> High-resolution ESI mass spectra of <b>4a</b> .                               | S31  |
| <b>Figure S28:</b> High-resolution ESI mass spectra of <b>4b</b> .                               | S32  |
| <b>Figure S29:</b> High-resolution ESI mass spectra of <b>5a</b> .                               | S33  |

|                                                                                             |     |
|---------------------------------------------------------------------------------------------|-----|
| <b>Figure S30:</b> High-resolution ESI mass spectra of <b>5b</b> .                          | S34 |
| <b>Figure S31:</b> UV-visible spectra for compounds <b>1a</b> and <b>1b</b> in DCM.         | S35 |
| <b>Figure S32:</b> UV-visible spectra for compounds <b>2a</b> and <b>2b</b> in DCM.         | S35 |
| <b>Figure S33:</b> UV-visible spectra for compounds <b>3a</b> and <b>3b</b> in DCM.         | S36 |
| <b>Figure S34:</b> UV-visible spectra for compounds <b>4a</b> and <b>4b</b> in DCM.         | S36 |
| <b>Figure S35:</b> UV-visible spectra for compounds <b>5a</b> and <b>5b</b> in DCM.         | S37 |
| <b>Figure S36:</b> Solvent polarity index ( $P^2$ ) versus $\lambda_{\max}$ for <b>1a</b> . | S38 |
| <b>Figure S37:</b> Solvent polarity index ( $P^2$ ) versus $\lambda_{\max}$ for <b>2a</b> . | S38 |
| <b>Figure S38:</b> Solvent polarity index ( $P^2$ ) versus $\lambda_{\max}$ for <b>3a</b> . | S39 |
| <b>Figure S39:</b> Solvent polarity index ( $P^2$ ) versus $\lambda_{\max}$ for <b>4a</b> . | S39 |
| <b>Figure S40:</b> Solvent polarity index ( $P^2$ ) versus $\lambda_{\max}$ for <b>5a</b> . | S40 |
| <b>Figure S41:</b> Solvent polarity index ( $P^2$ ) versus $\lambda_{\max}$ for <b>1b</b> . | S40 |
| <b>Figure S42:</b> Solvent polarity index ( $P^2$ ) versus $\lambda_{\max}$ for <b>2b</b> . | S41 |
| <b>Figure S43:</b> Solvent polarity index ( $P^2$ ) versus $\lambda_{\max}$ for <b>3b</b> . | S41 |
| <b>Figure S44:</b> Solvent polarity index ( $P^2$ ) versus $\lambda_{\max}$ for <b>4b</b> . | S42 |
| <b>Figure S45:</b> Solvent polarity index ( $P^2$ ) versus $\lambda_{\max}$ for <b>5b</b> . | S42 |
| <b>Figure S46:</b> DSC thermogram of <b>1a</b> .                                            | S43 |
| <b>Figure S47:</b> DSC thermogram of <b>1b</b> .                                            | S44 |
| <b>Figure S48:</b> DSC thermogram of <b>2a</b> .                                            | S45 |
| <b>Figure S49:</b> DSC thermogram of <b>2b</b> .                                            | S46 |
| <b>Figure S50:</b> DSC thermogram of <b>3a</b> .                                            | S47 |
| <b>Figure S51:</b> DSC thermogram of <b>3b</b> .                                            | S48 |
| <b>Figure S52:</b> DSC thermogram of <b>4a</b> .                                            | S49 |
| <b>Figure S53:</b> DSC thermogram of <b>4b</b> .                                            | S50 |
| <b>Figure S54:</b> DSC thermogram of <b>5a</b> .                                            | S51 |
| <b>Figure S55:</b> DSC thermogram of <b>5b</b> .                                            | S52 |
| <b>Figure S56:</b> The structures of compound <b>1a</b> with 35% thermal ellipsoids.        | S53 |
| <b>Figure S57:</b> The structures of compound <b>1b</b> with 35% thermal ellipsoids.        | S54 |

|                                                                                                                     |     |
|---------------------------------------------------------------------------------------------------------------------|-----|
| <b>Figure S58:</b> The structures of compound <b>2a</b> with 35% thermal ellipsoids.                                | S55 |
| <b>Figure S59:</b> The structures of compound <b>2b</b> with 35% thermal ellipsoids.                                | S56 |
| <b>Figure S60:</b> The structures of compound <b>3a</b> with 35% thermal ellipsoids.                                | S57 |
| <b>Figure S61:</b> The structures of compound <b>3b</b> with 35% thermal ellipsoids.                                | S58 |
| <b>Figure S62:</b> The structures of compound <b>5b</b> with 35% thermal ellipsoids.                                | S59 |
| <b>Figure S63:</b> FTIR spectrum of 100 mol % DOPC vesicles.                                                        | S60 |
| <b>Figure S64:</b> FTIR spectrum of 95 mol % DOPC vesicles, and 5 mol %<br>by Re(I) content of compound <b>5a</b> . | S60 |
| <b>Table S1:</b> X-ray crystal data and structure parameters<br>for compounds <b>1a,b</b> and <b>2a,b</b> .         | S61 |
| <b>Table S2:</b> X-ray crystal data and structure parameters<br>for compounds <b>3a,b</b> and <b>5b</b> .           | S62 |
| <b>Table S3:</b> Selected bond lengths and angles for compounds <b>1a,b</b> and <b>2a,b</b> .                       | S63 |
| <b>Table S4:</b> Selected bond lengths and angles for compounds <b>3a,b</b> , and <b>5b</b> .                       | S64 |

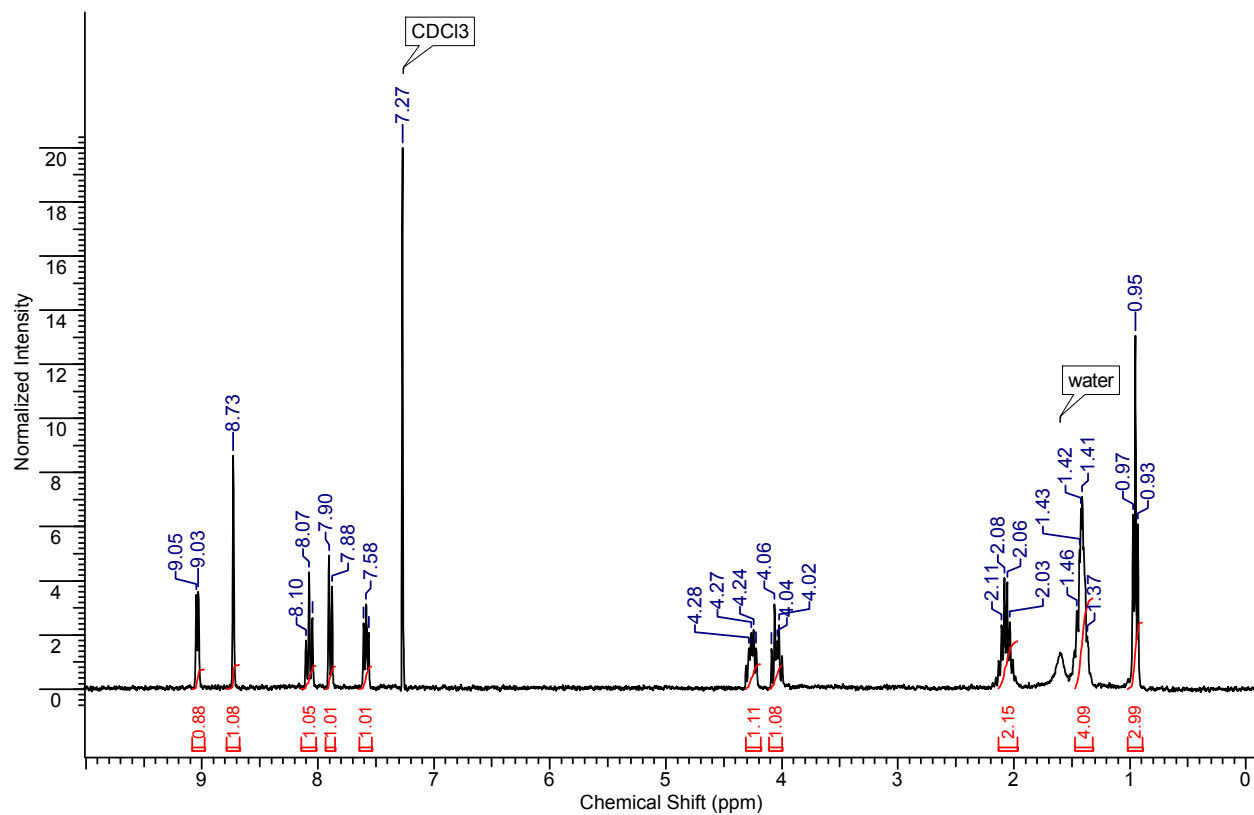

Figure S1:  $^1\text{H}$  NMR (300 MHz) of **1a** in  $\text{CDCl}_3$ .

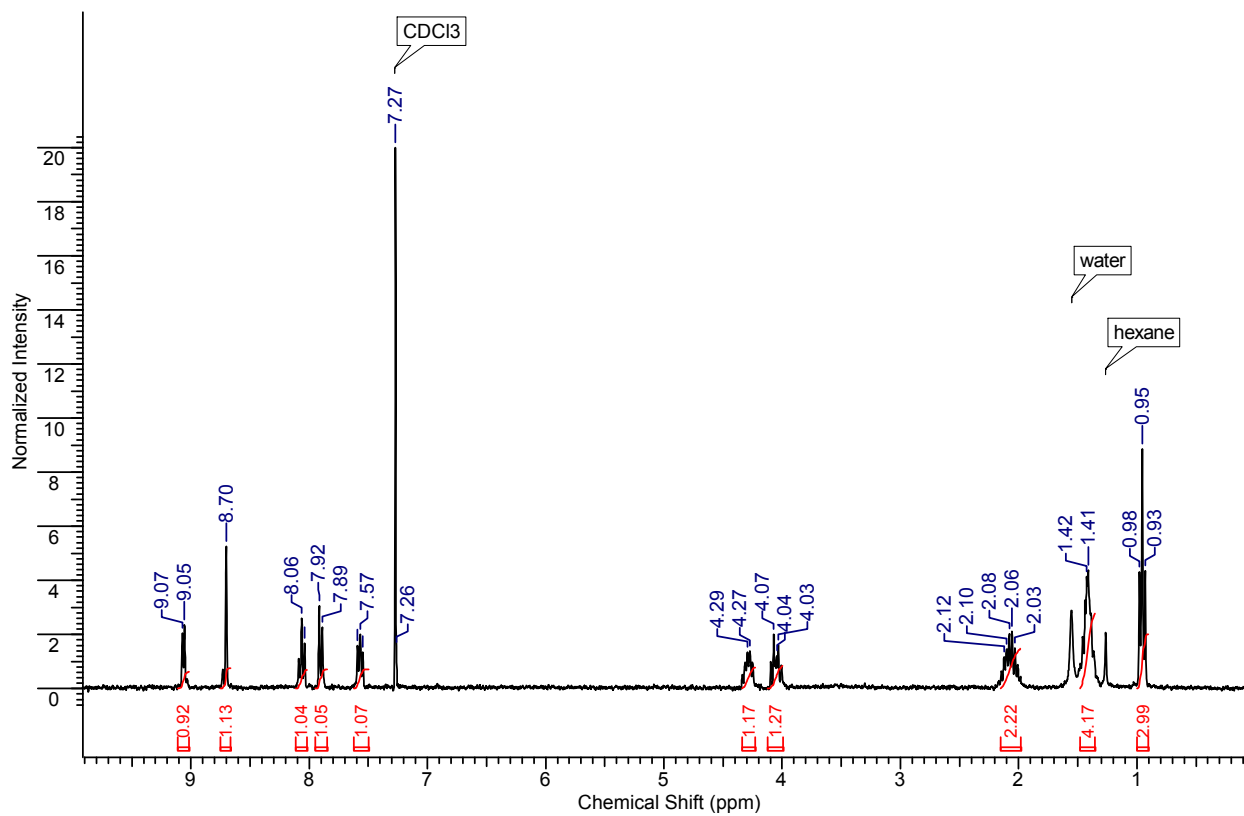

Figure S2:  $^1\text{H}$  NMR (300 MHz) of **1b** in  $\text{CDCl}_3$ .

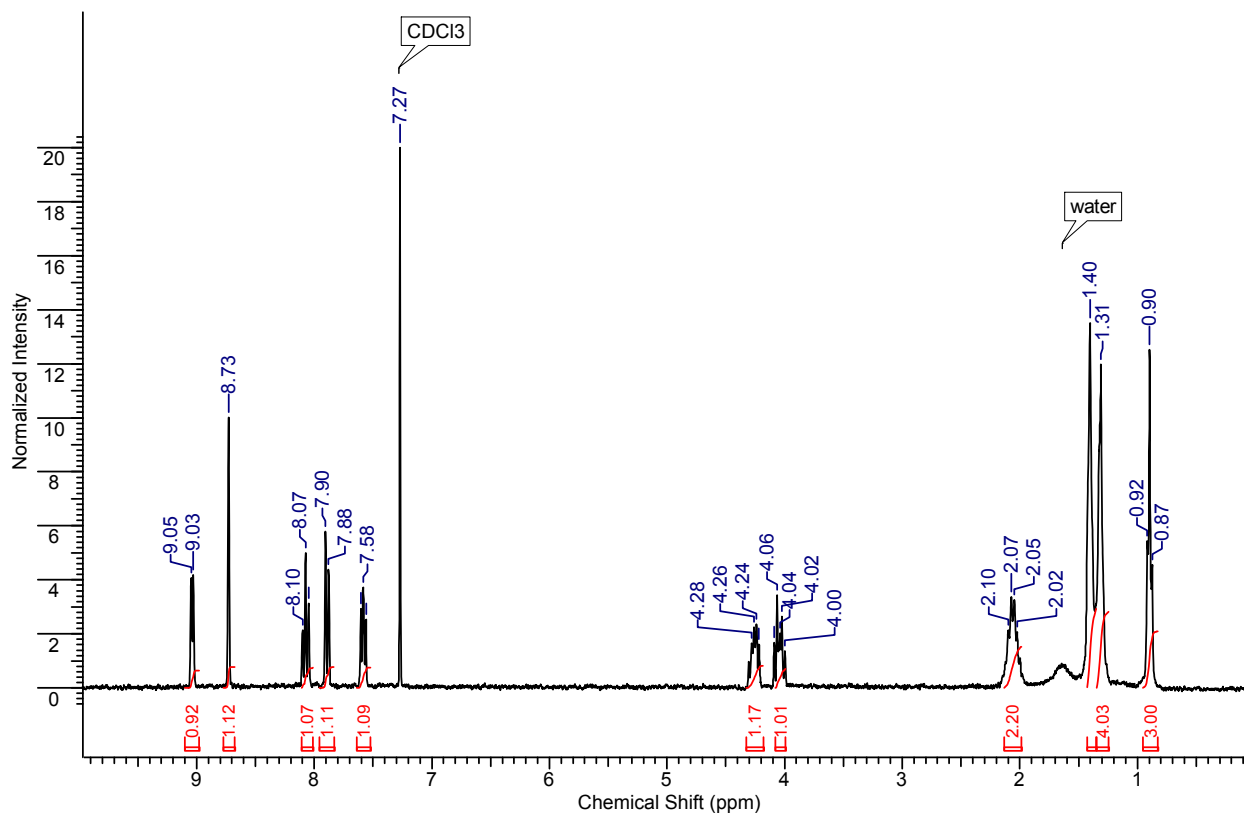

Figure S3:  $^1\text{H}$  NMR (300 MHz) of **2a** in  $\text{CDCl}_3$ .

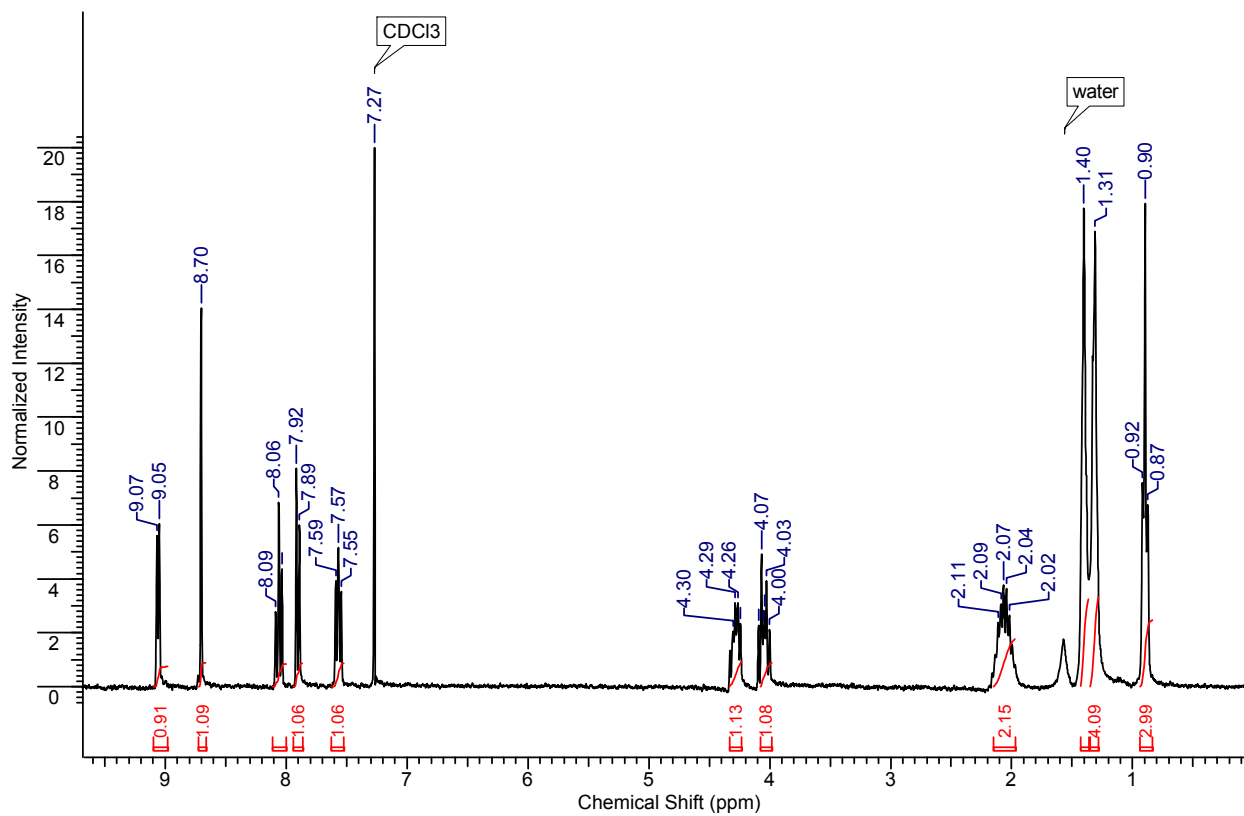

Figure S4:  $^1\text{H}$  NMR (300 MHz) of **2b** in  $\text{CDCl}_3$ .



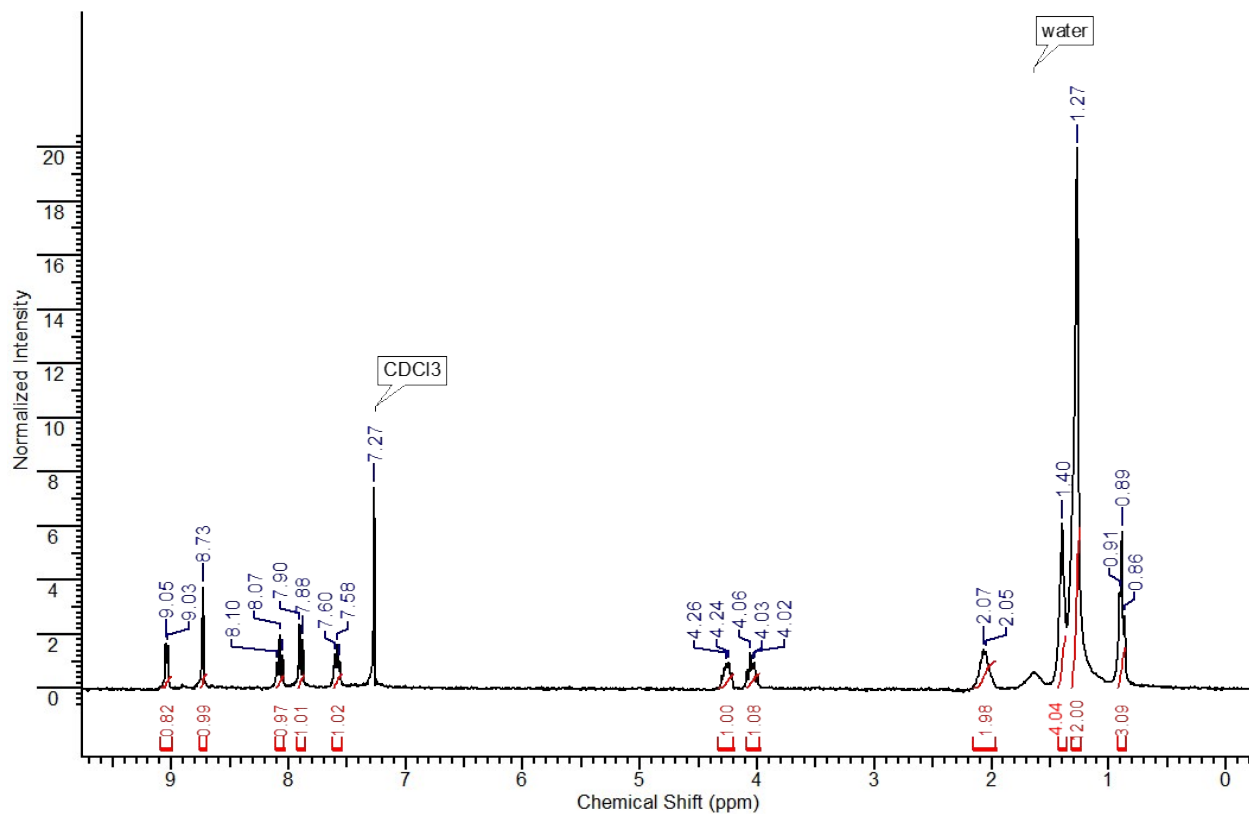

Figure S5:  $^1\text{H}$  NMR (300 MHz) of **3a** in  $\text{CDCl}_3$ .

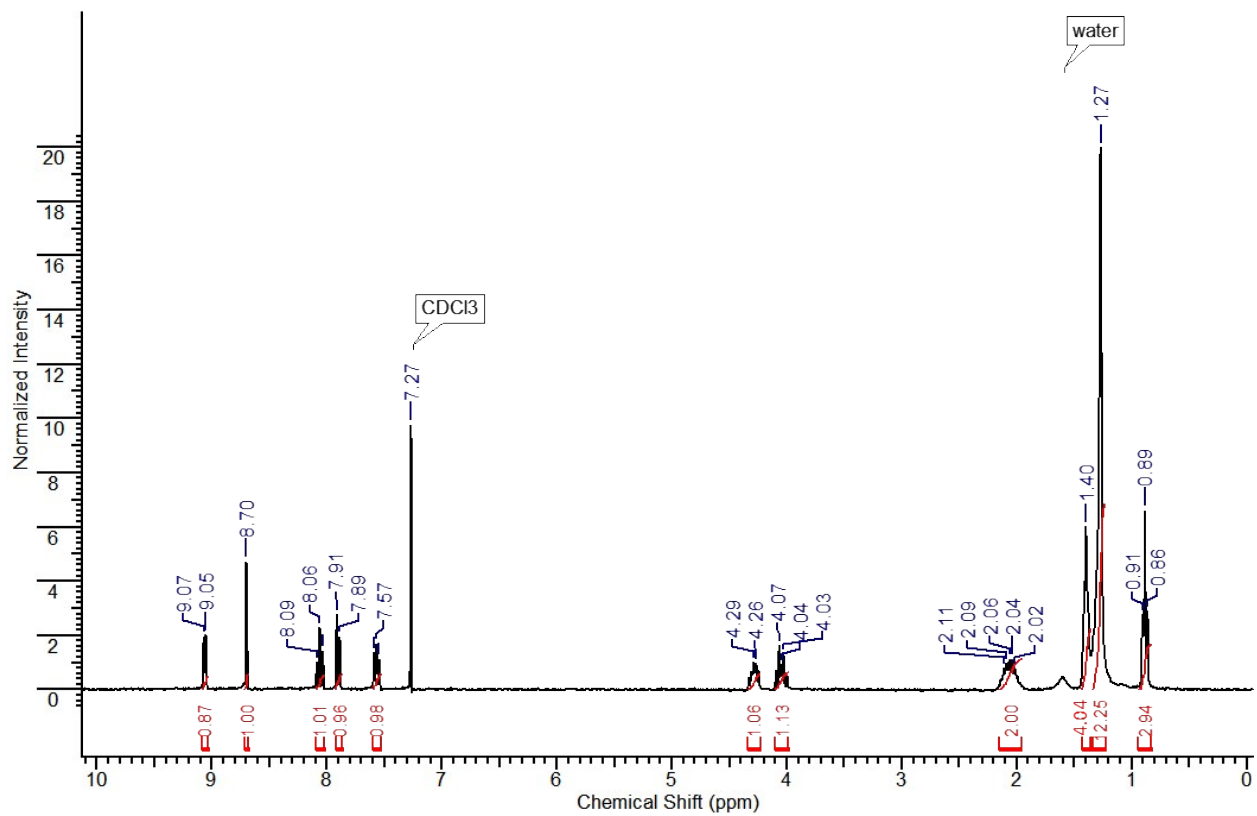

Figure S6:  $^1\text{H}$  NMR (300 MHz) of **3b** in  $\text{CDCl}_3$ .

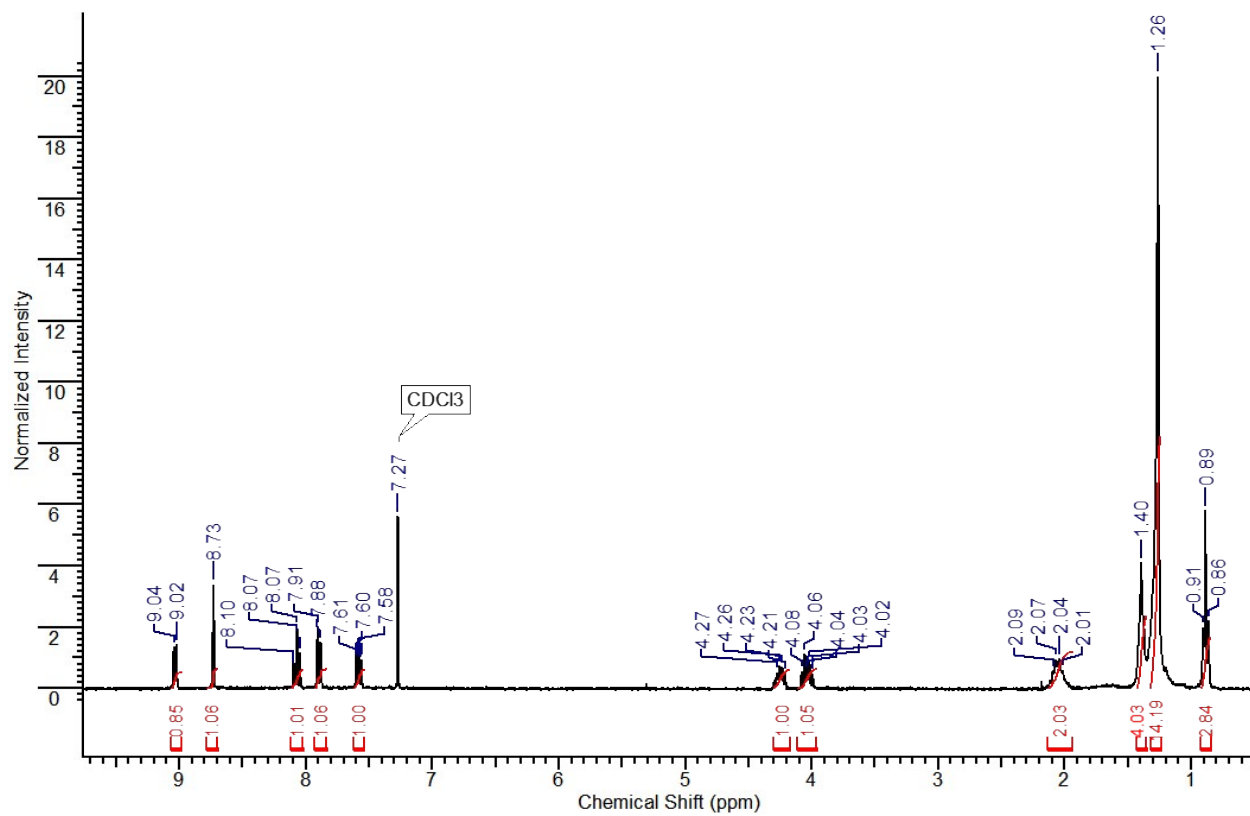

**Figure S7:**  $^1\text{H}$  NMR (300 MHz) of **4a** in  $\text{CDCl}_3$ .

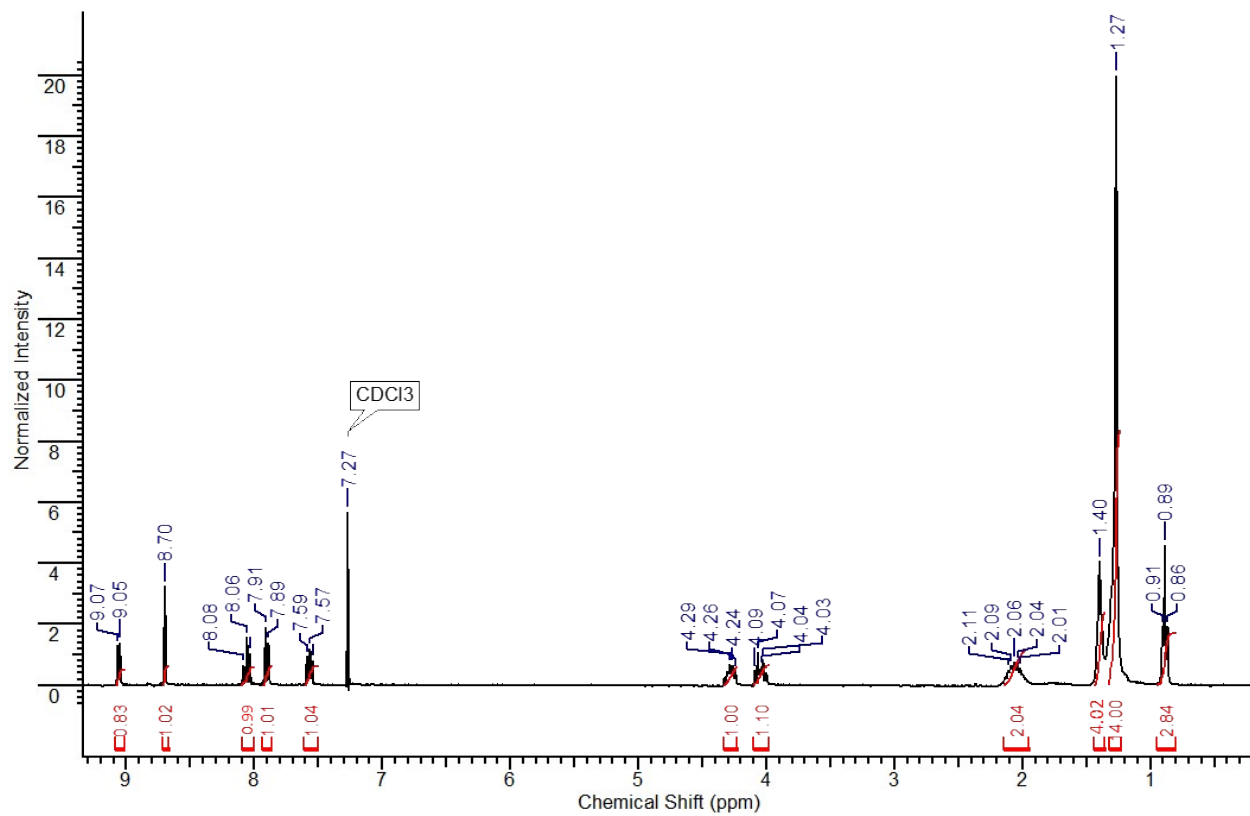

**Figure S8:** <sup>1</sup>H NMR (300 MHz) of **4b** in CDCl<sub>3</sub>.

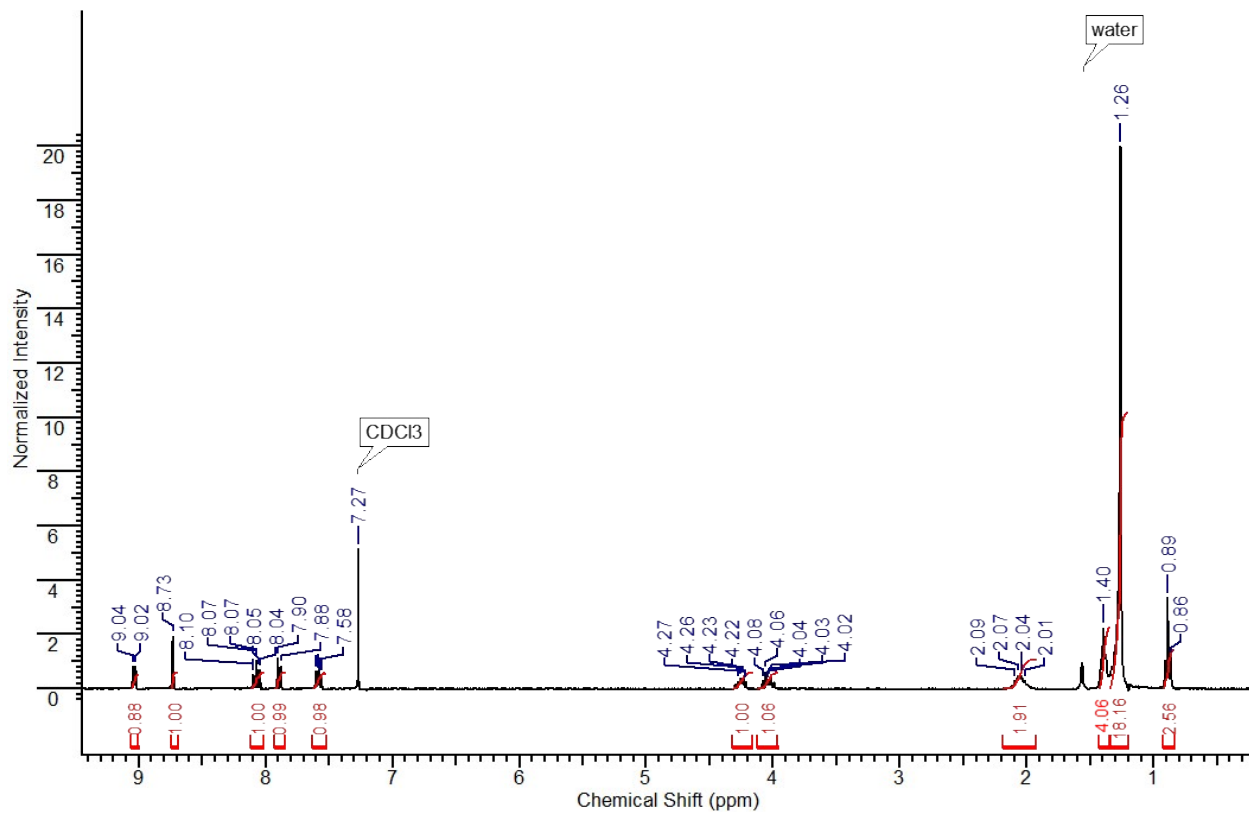

**Figure S9:**  $^1\text{H}$  NMR (300 MHz) of **5a** in  $\text{CDCl}_3$ .

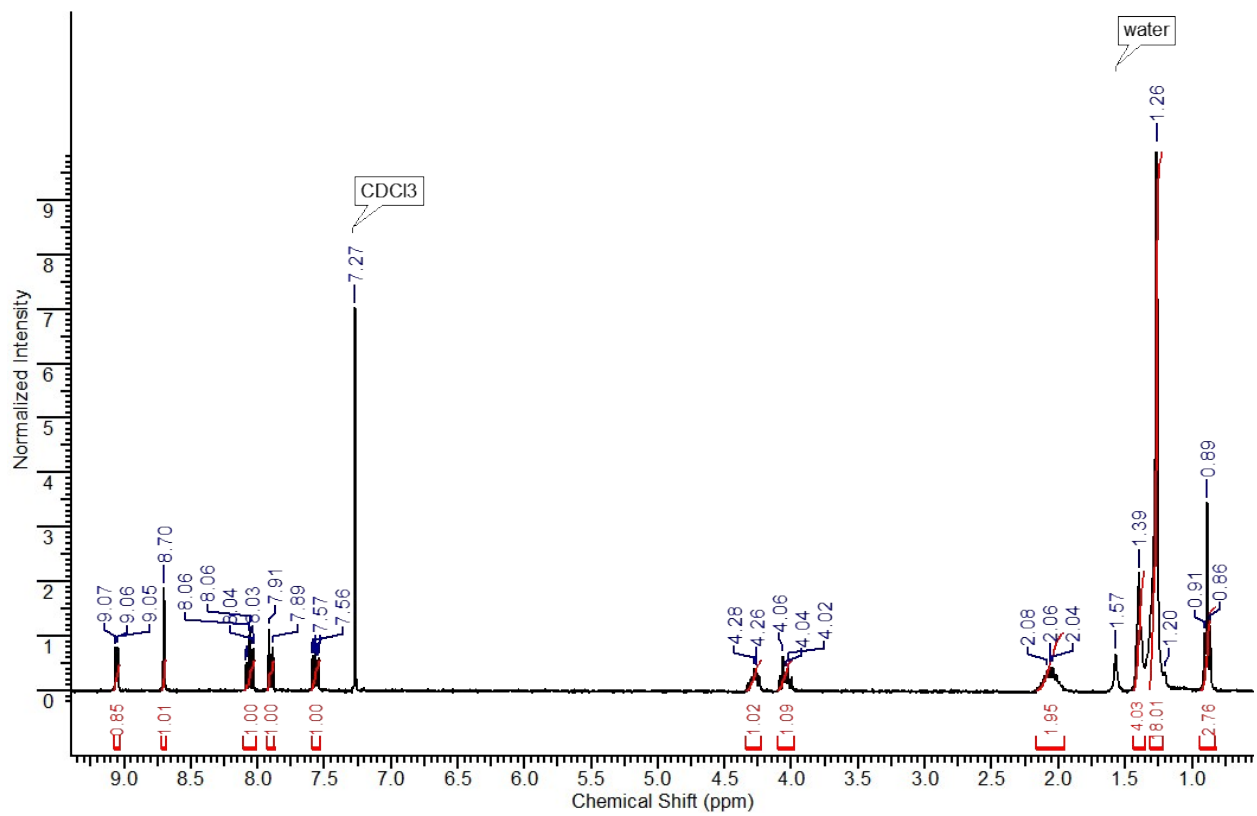

Figure S10:  $^1\text{H}$  NMR (300 MHz) of **5b** in  $\text{CDCl}_3$ .

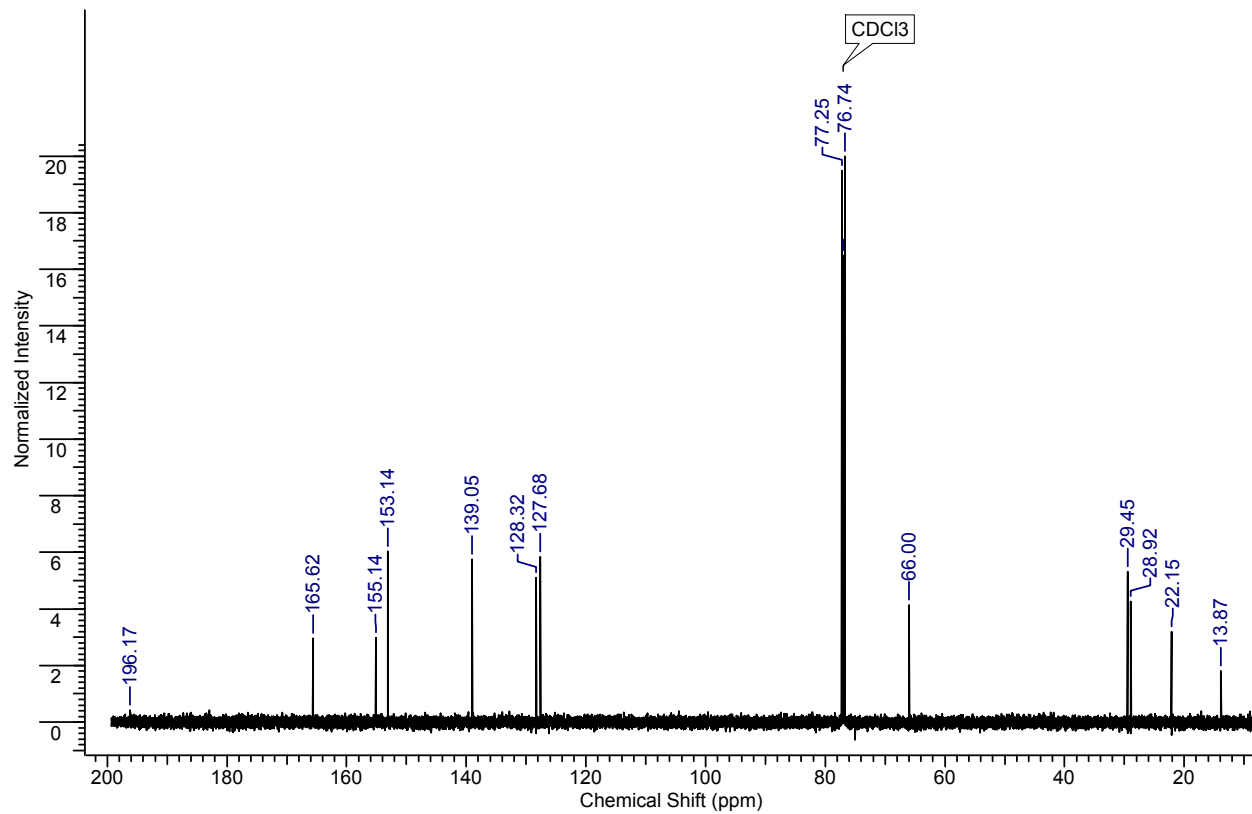

**Figure S11:**  $^{13}\text{C}\{^1\text{H}\}$  NMR (125 MHz) of **1a** in  $\text{CDCl}_3$ .

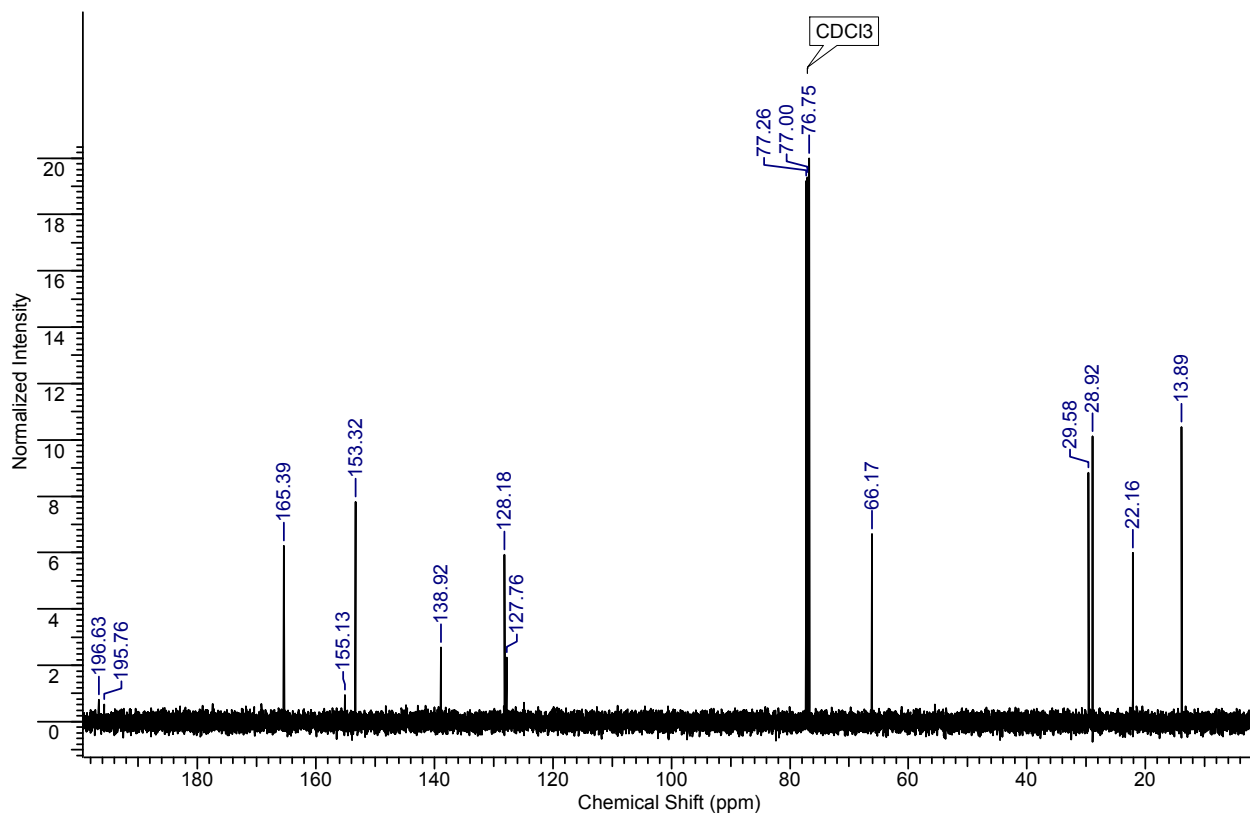

**Figure S12:**  $^{13}\text{C}\{^1\text{H}\}$  NMR (125 MHz) of **1b** in  $\text{CDCl}_3$ .



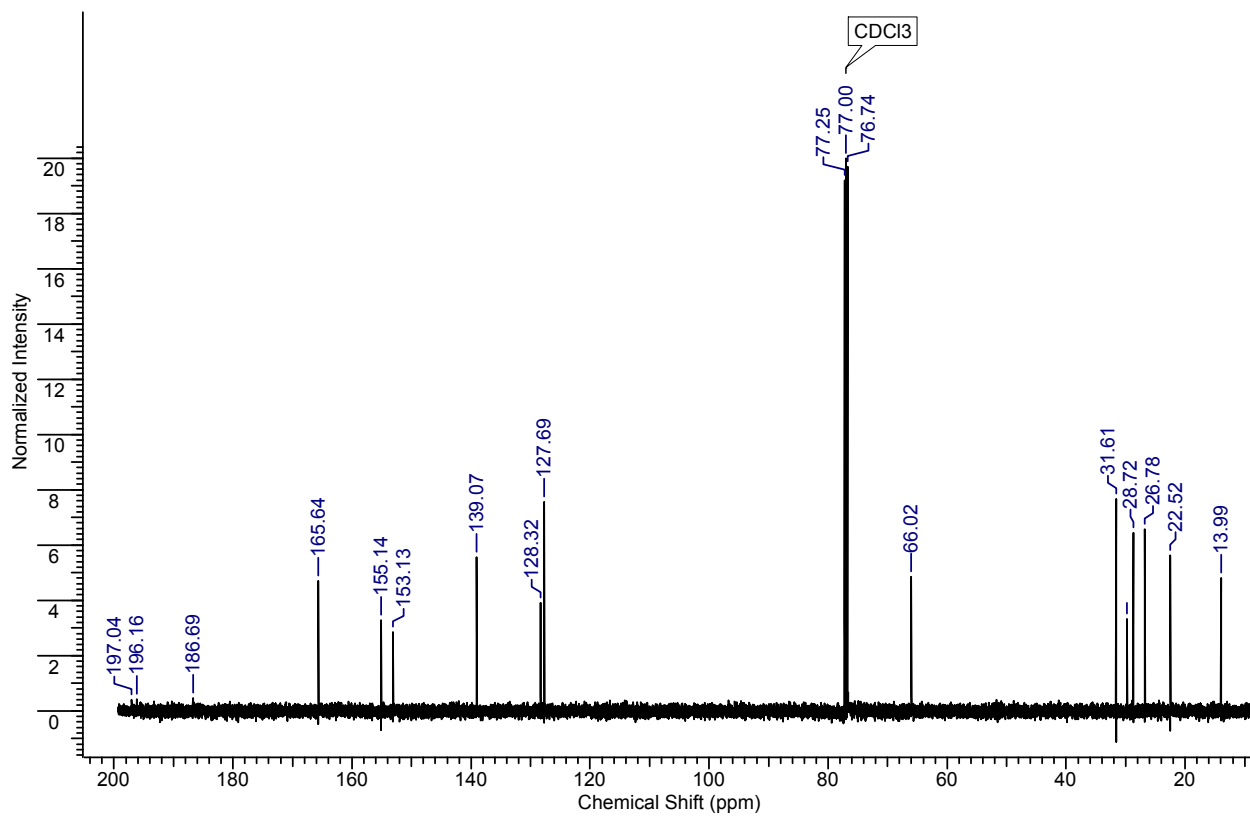

**Figure S13:**  $^{13}\text{C}\{^1\text{H}\}$  NMR (125 MHz) of **2a** in  $\text{CDCl}_3$ .

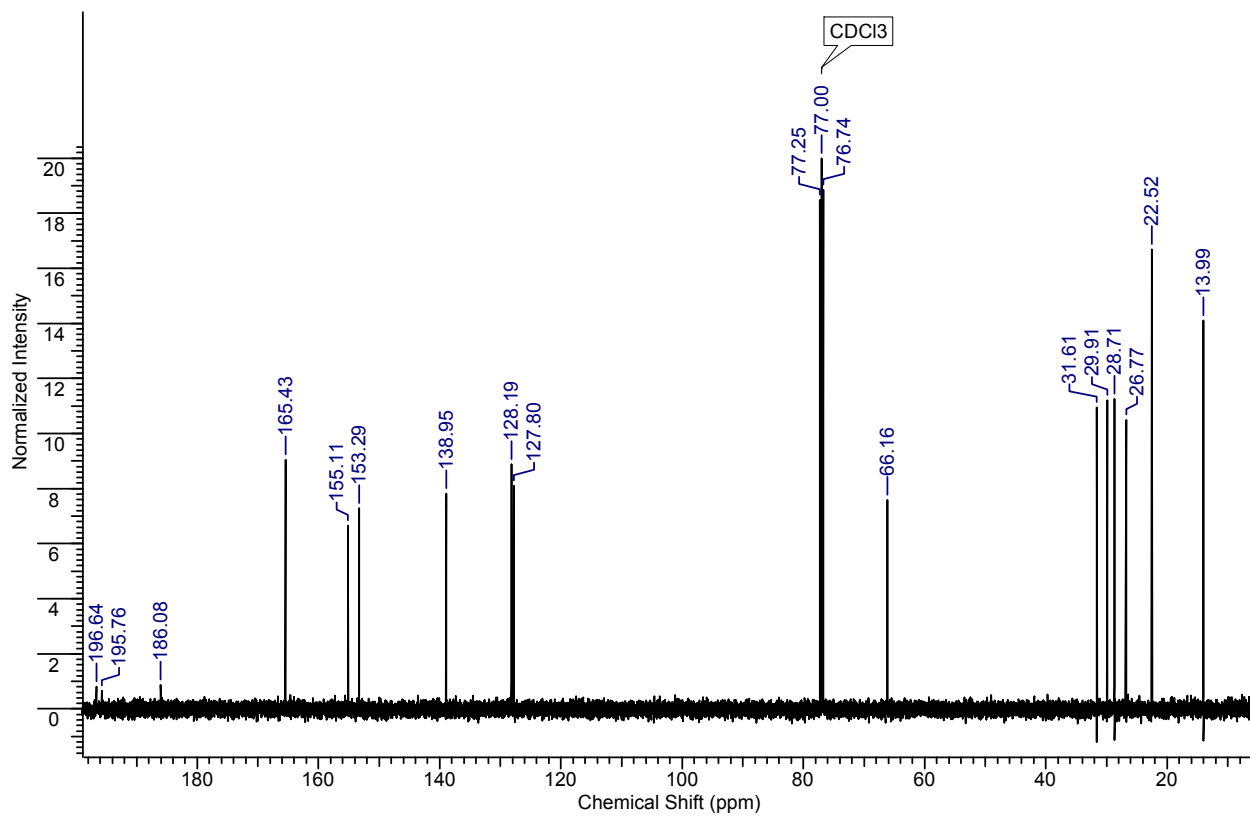

**Figure S14:**  $^{13}\text{C}\{^1\text{H}\}$  NMR (125 MHz) of **2b** in  $\text{CDCl}_3$ .

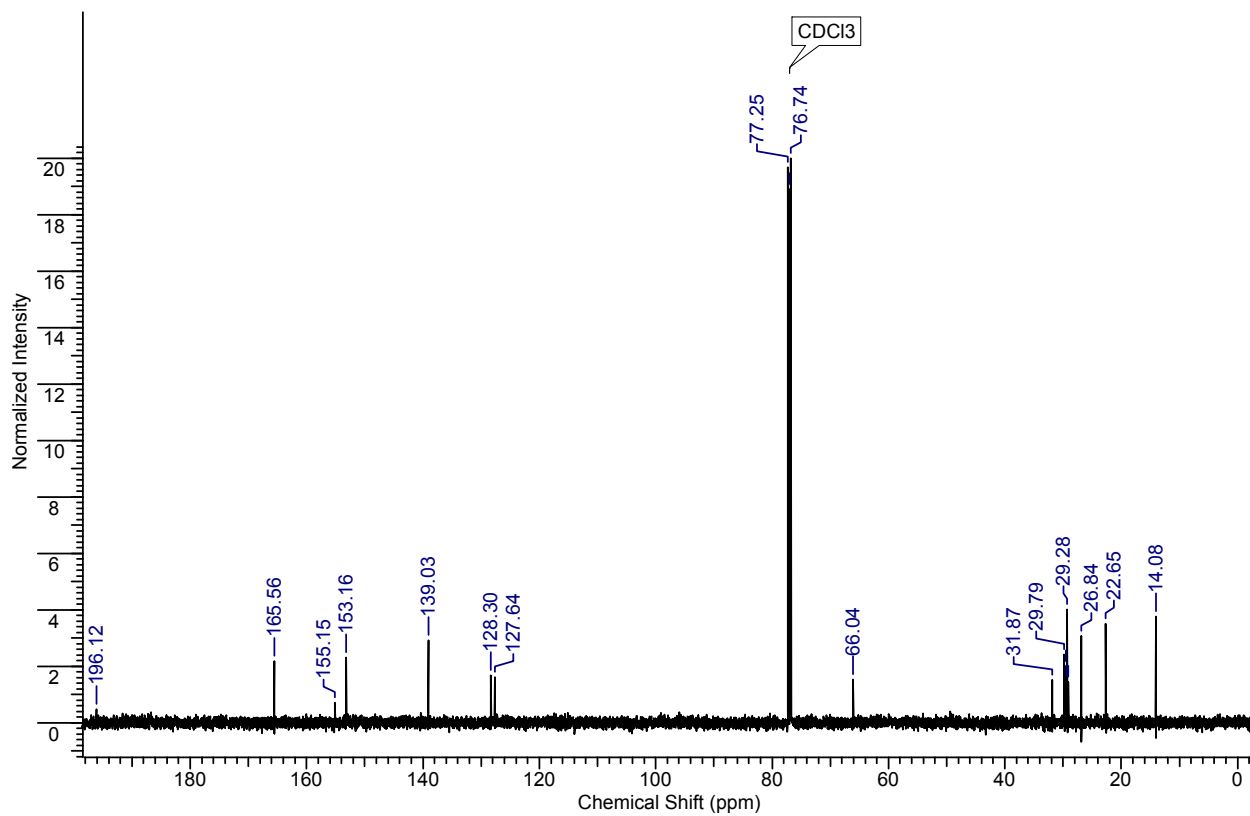

**Figure S15:**  $^{13}\text{C}\{^1\text{H}\}$  NMR (125 MHz) of **3a** in  $\text{CDCl}_3$ .

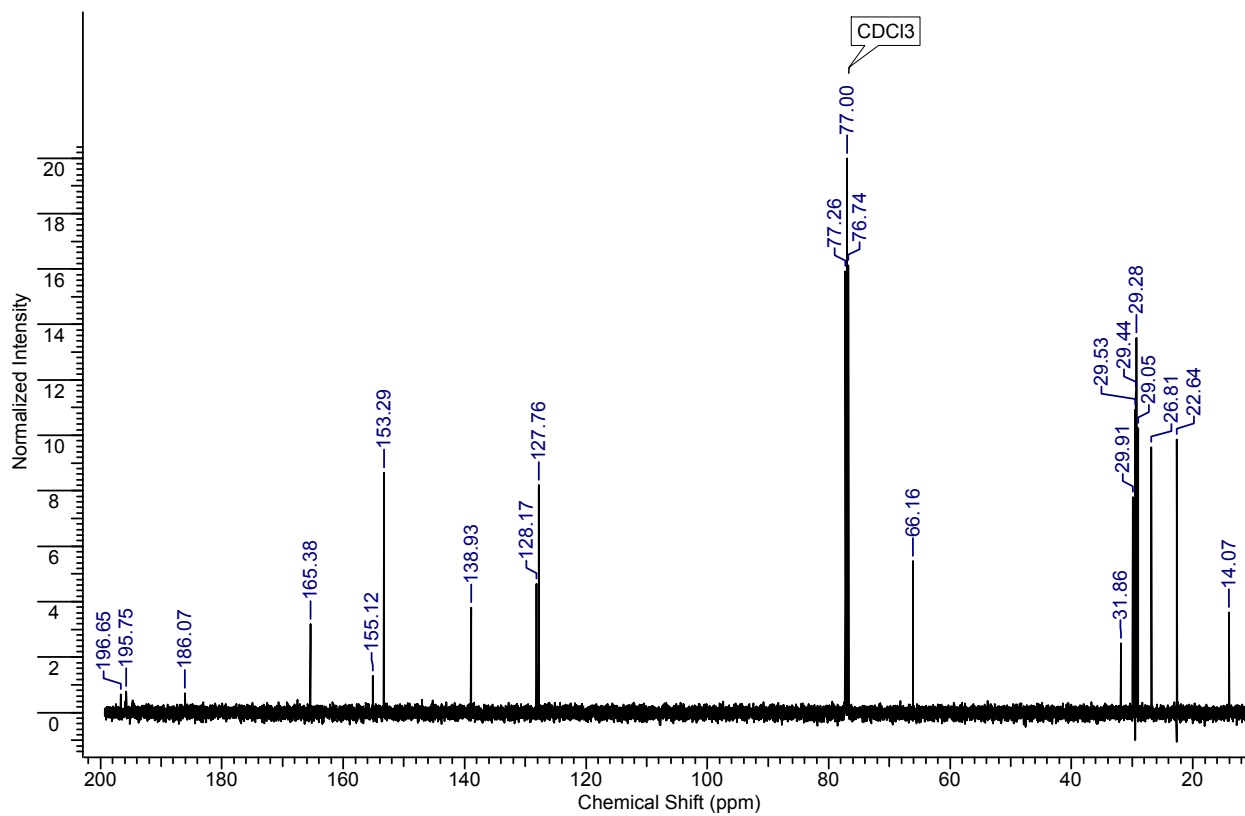

**Figure S16:**  $^{13}\text{C}\{^1\text{H}\}$  NMR (125 MHz) of **3b** in  $\text{CDCl}_3$ .

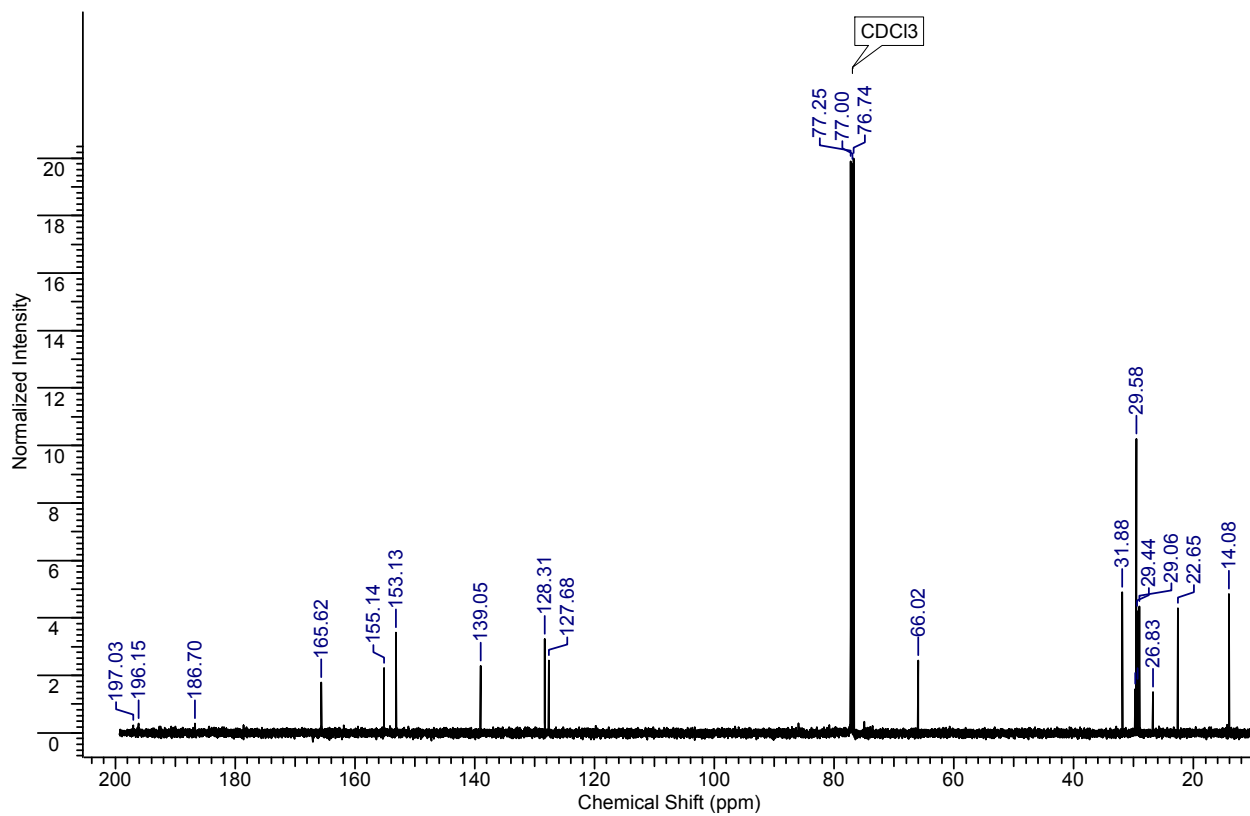

**Figure S17:**  $^{13}\text{C}\{^1\text{H}\}$  NMR (125 MHz) of **4a** in  $\text{CDCl}_3$ .

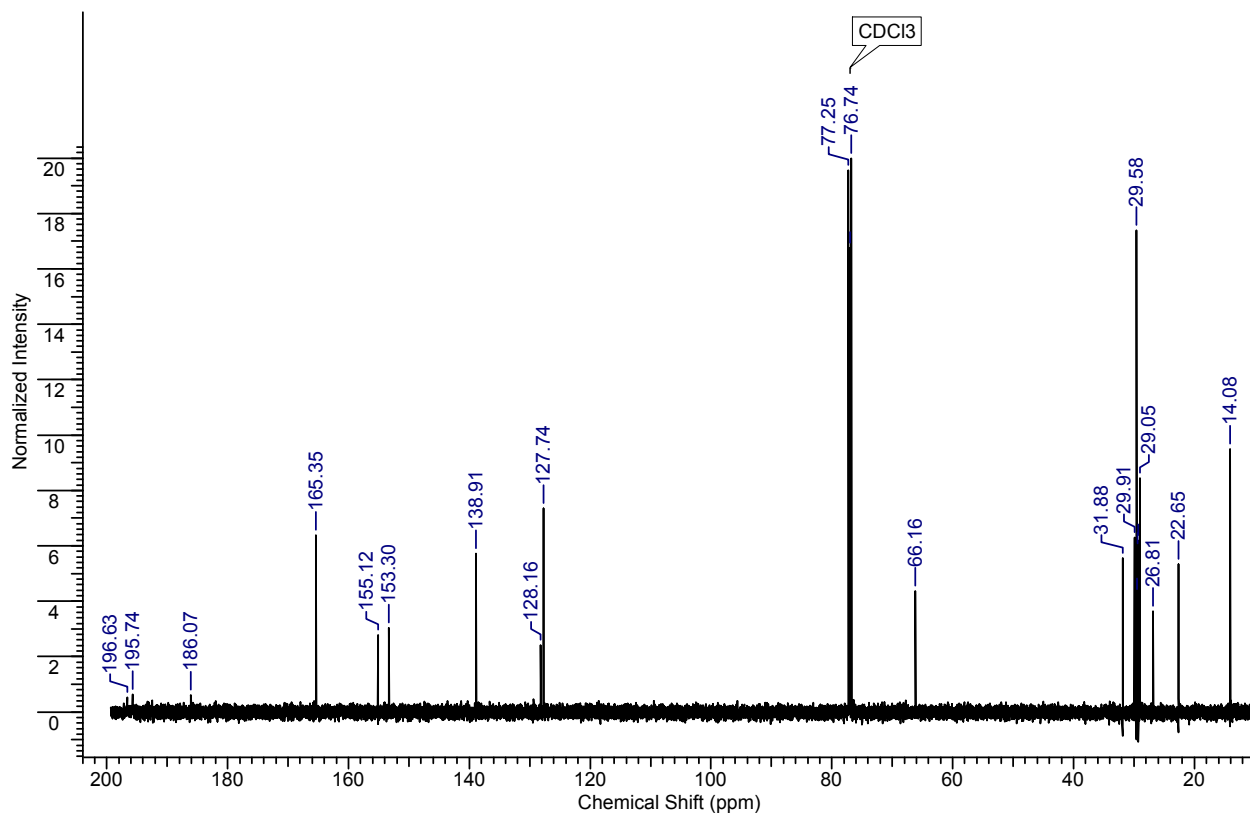

**Figure S18:**  $^{13}\text{C}\{^1\text{H}\}$  NMR (125 MHz) of **4b** in  $\text{CDCl}_3$ .

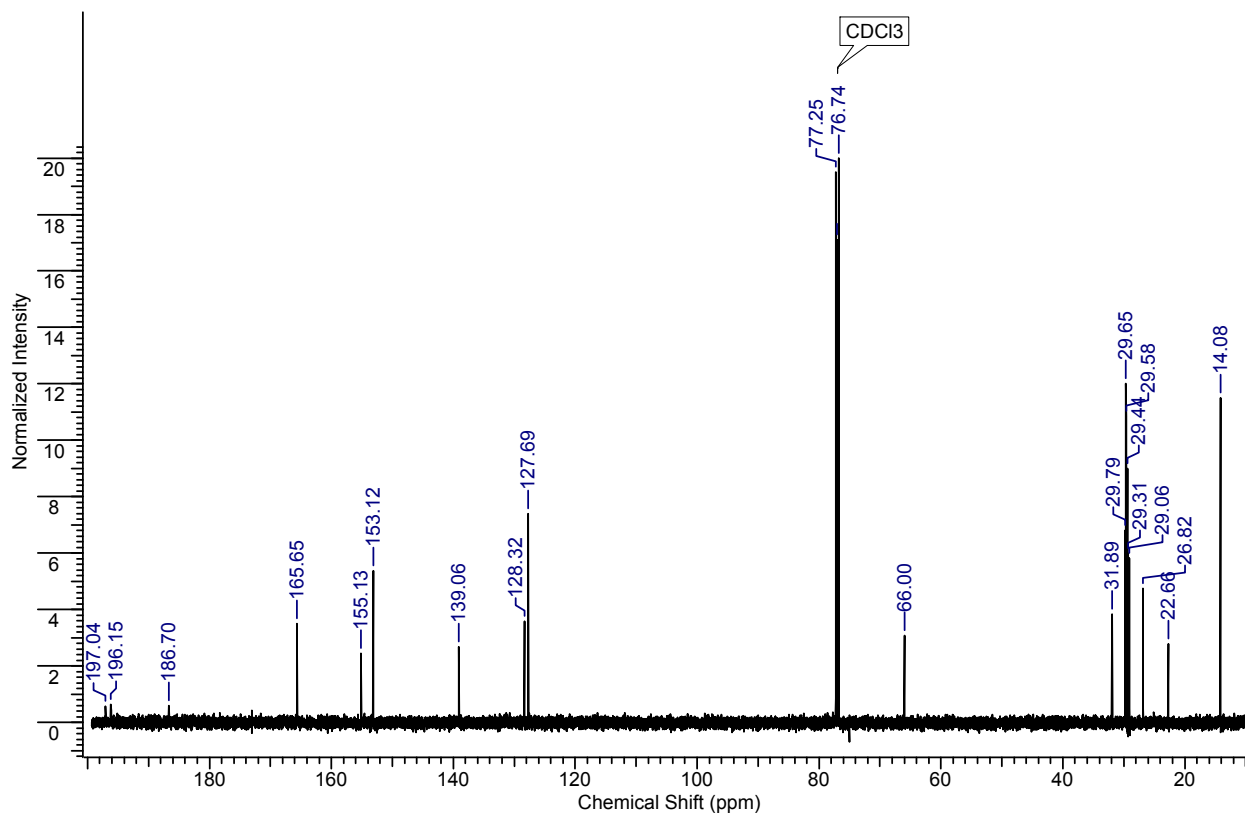

**Figure S19:**  $^{13}\text{C}\{^1\text{H}\}$  NMR (125 MHz) of **5a** in  $\text{CDCl}_3$ .

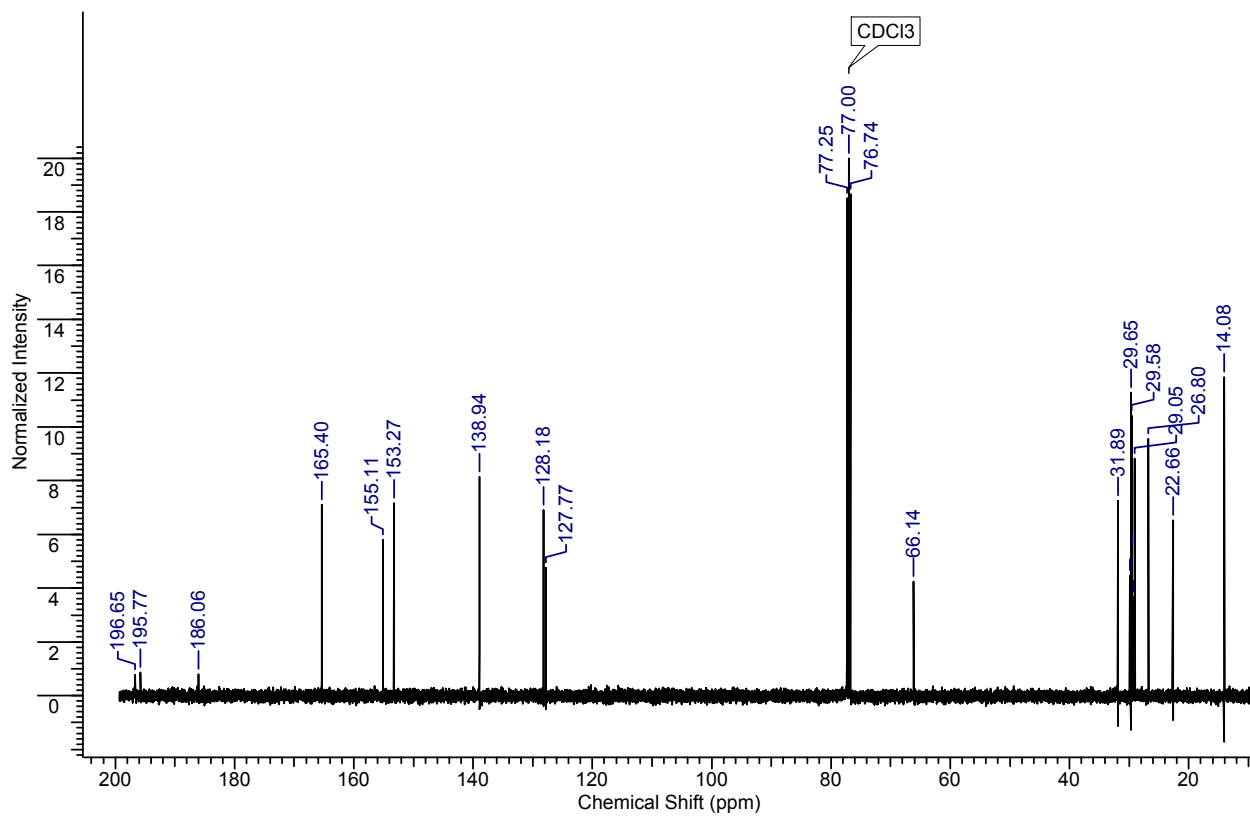

**Figure S20:**  $^{13}\text{C}\{^1\text{H}\}$  NMR (125 MHz) of **5b** in  $\text{CDCl}_3$ .



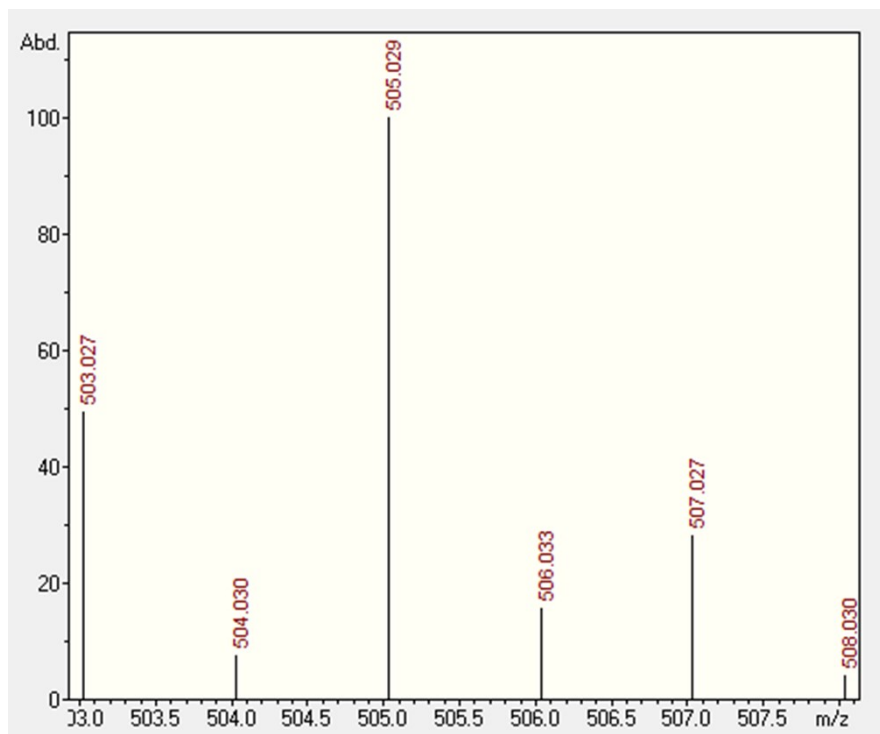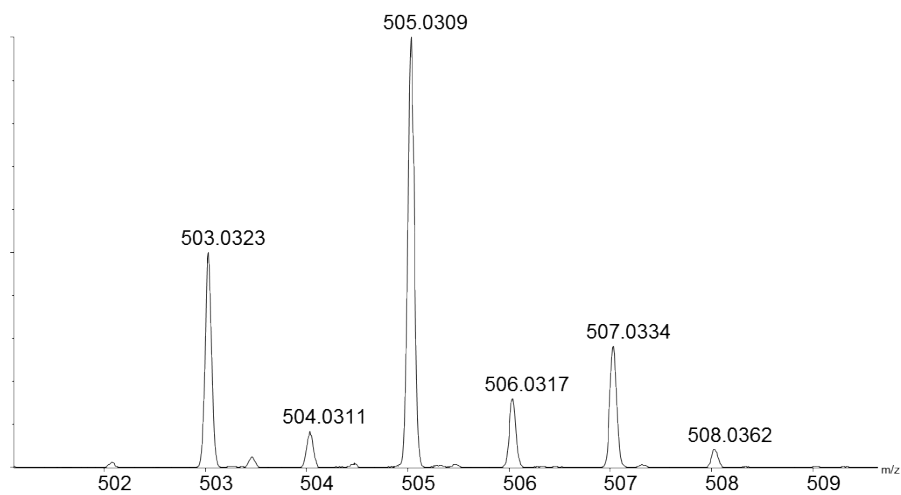

**Figure S21:** High-resolution ESI mass spectra of **1a**. Top: calculated spectrum. Bottom: experimental spectrum.

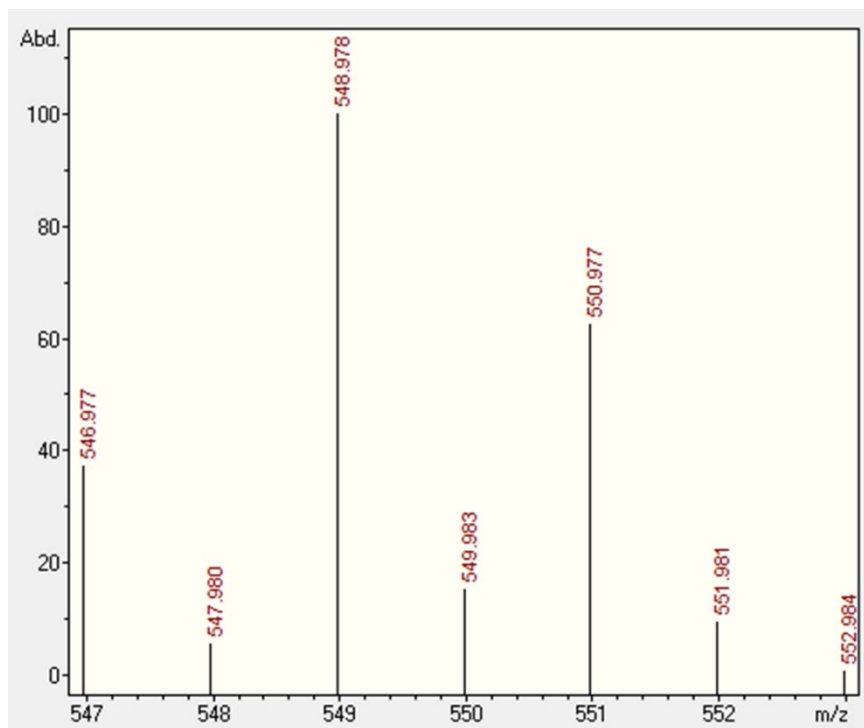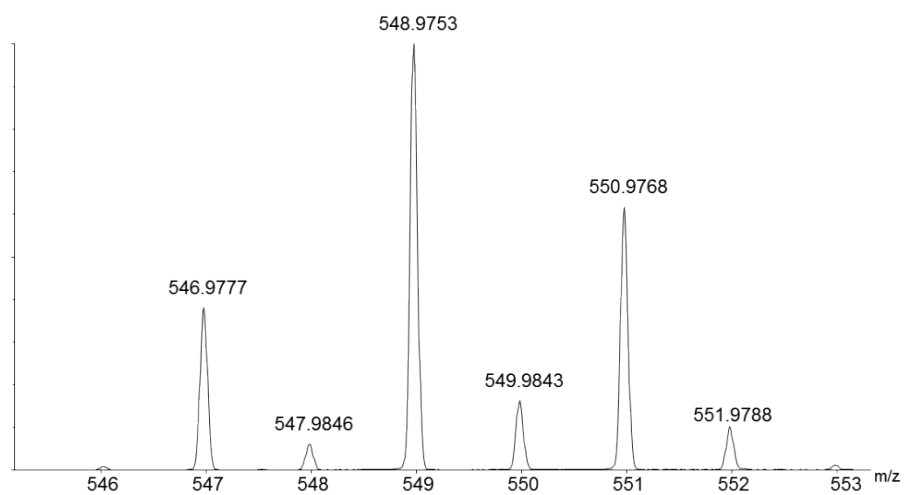

**Figure S22:** High-resolution ESI mass spectra of **1b**. Top: calculated spectrum. Bottom: experimental spectrum.

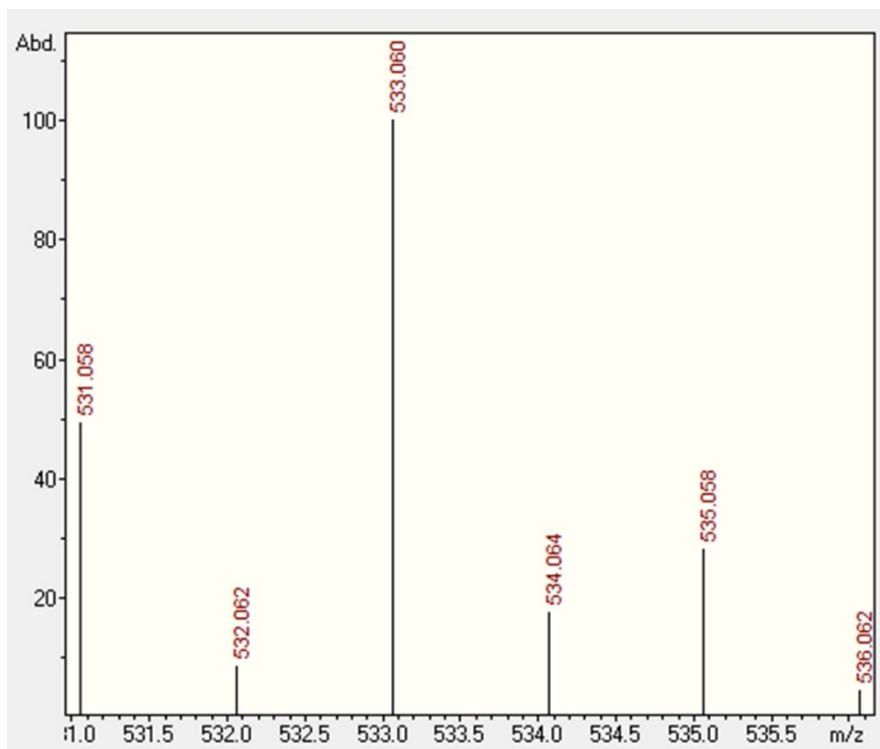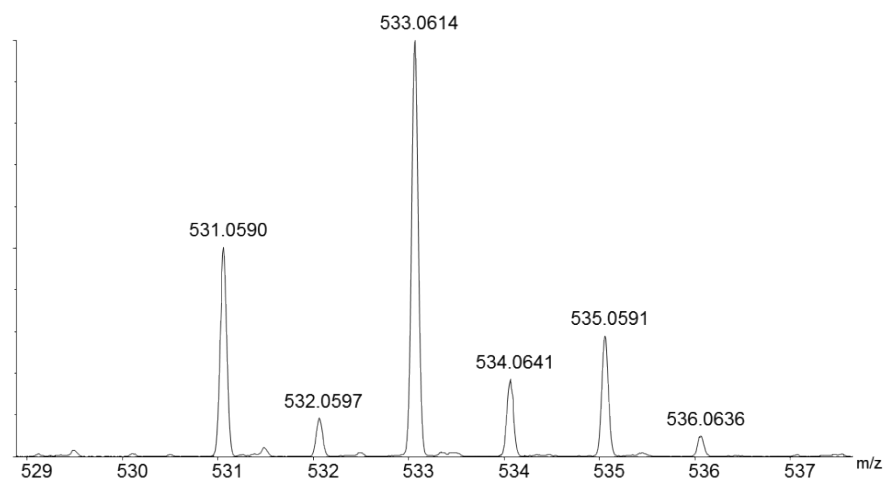

**Figure S23:** High-resolution ESI mass spectra of **2a**. Top: calculated spectrum. Bottom: experimental spectrum.

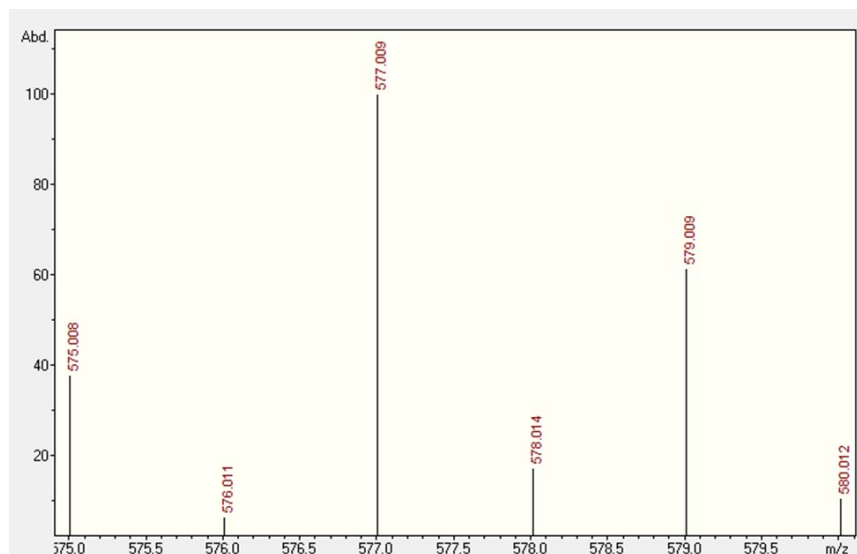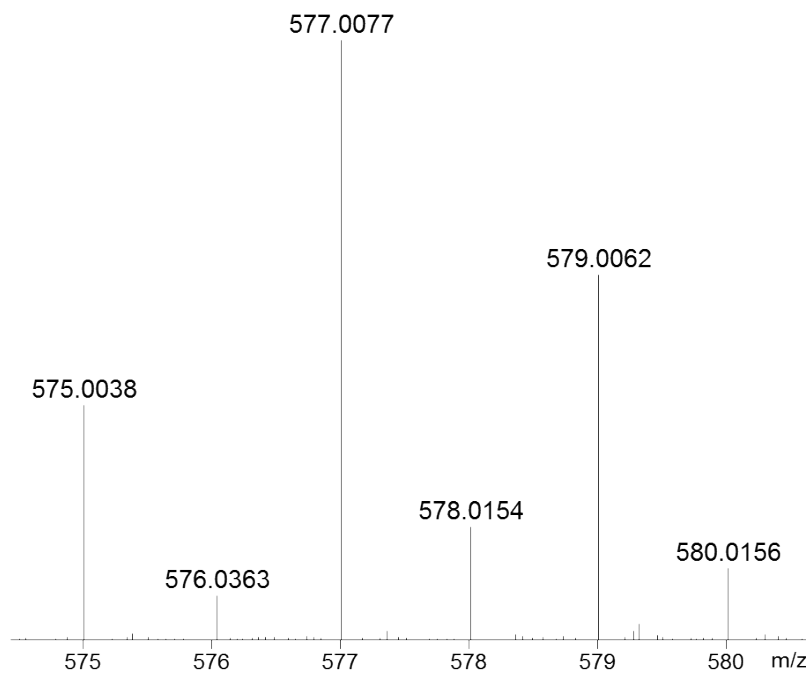

**Figure S24:** High-resolution ESI mass spectra of **2b**. Top: calculated spectrum. Bottom: experimental spectrum.

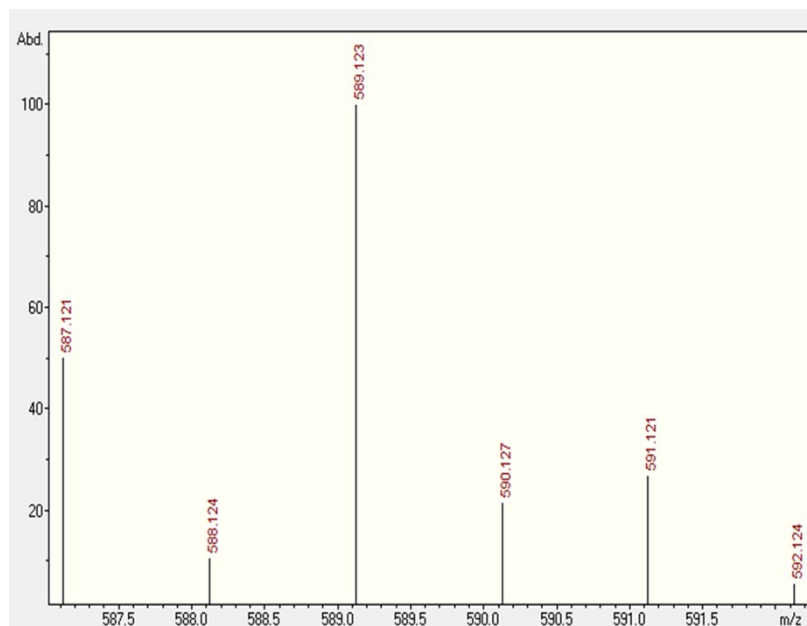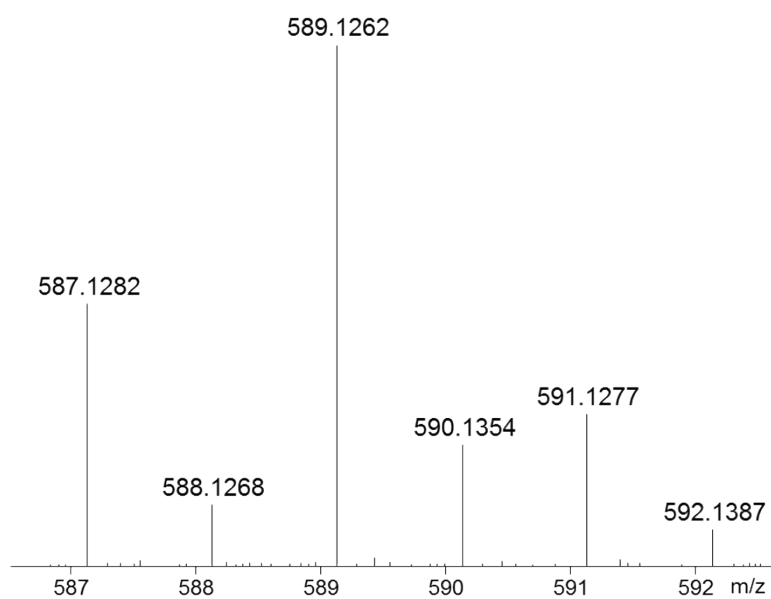

**Figure S25:** High-resolution ESI mass spectra of **3a**. Top: calculated spectrum. Bottom: experimental spectrum.

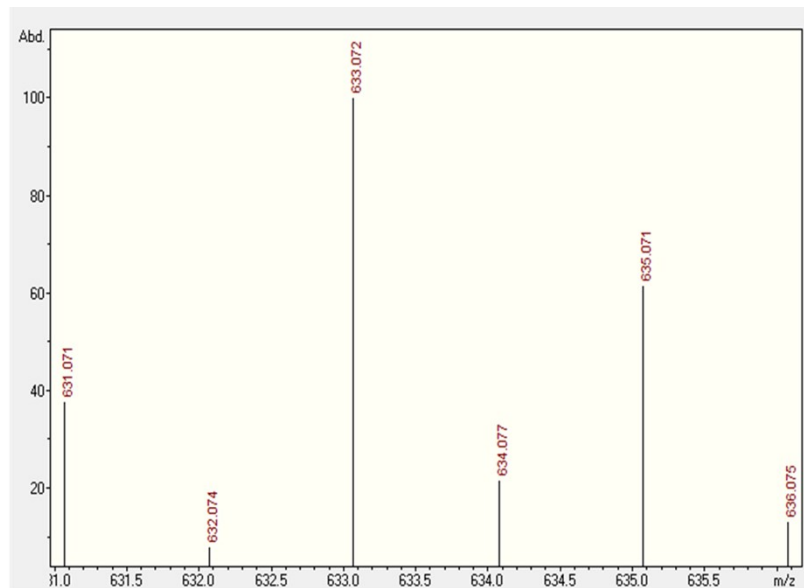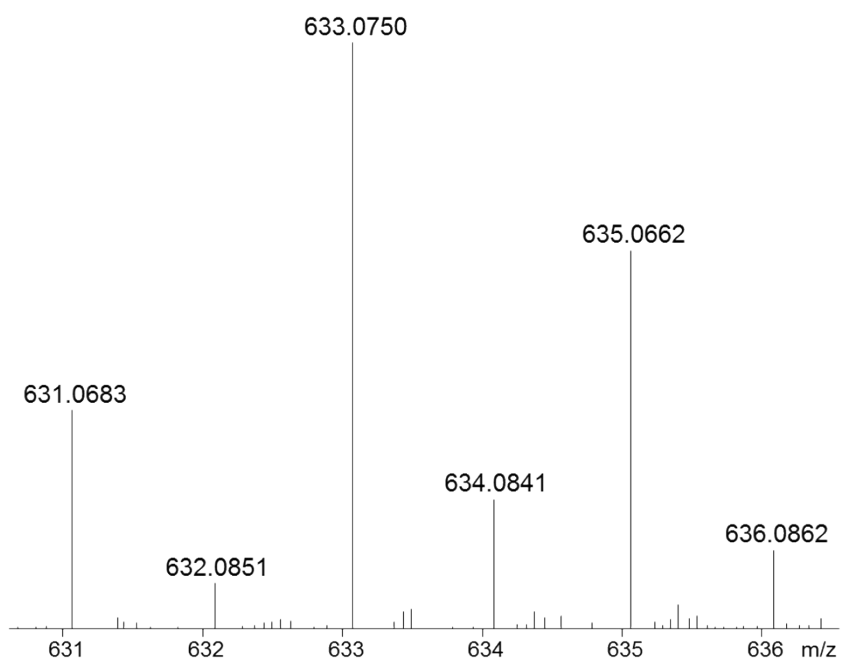

**Figure S26:** High-resolution ESI mass spectra of **3b**. Top: calculated spectrum. Bottom: experimental spectrum.

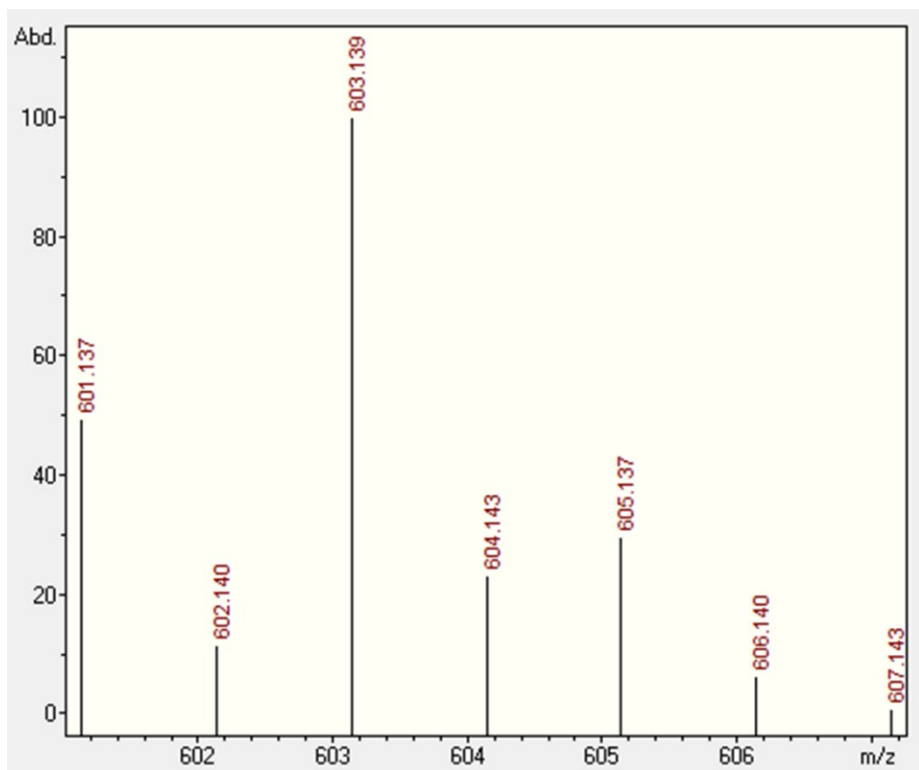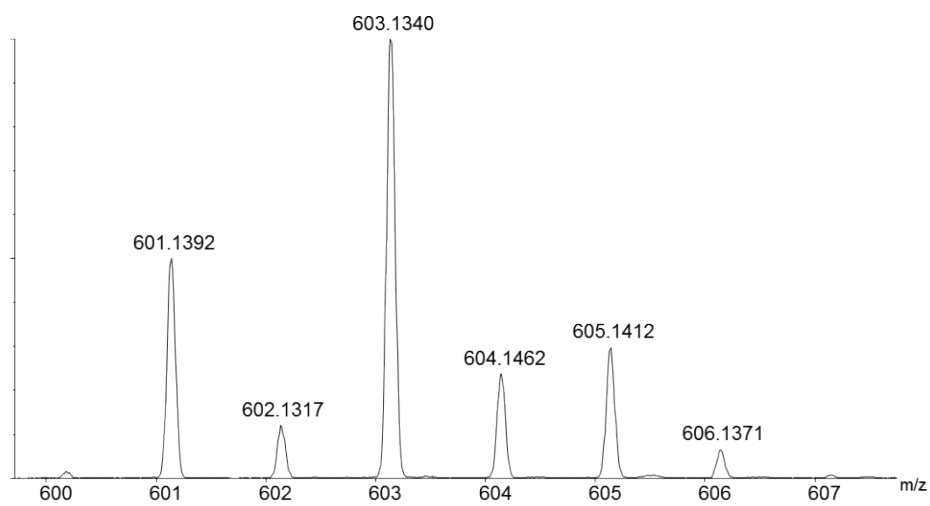

**Figure S27:** High-resolution ESI mass spectra of **4a**. Top: calculated spectrum. Bottom: experimental spectrum.

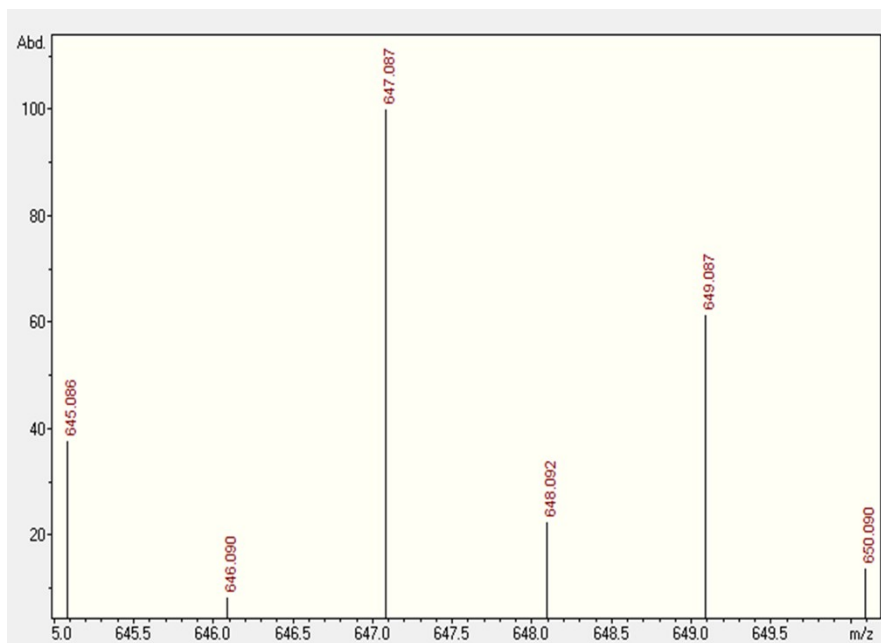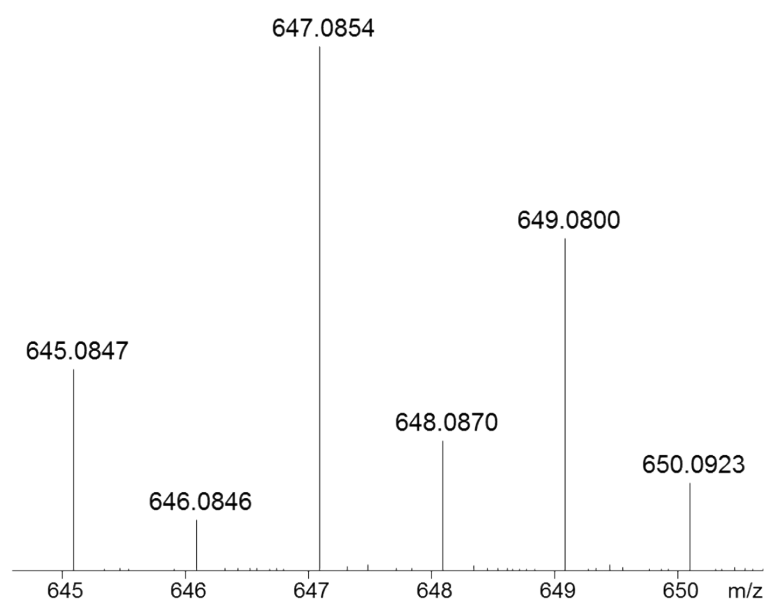

**Figure S28:** High-resolution ESI mass spectra of **4b**. Top: calculated spectrum. Bottom: experimental spectrum.



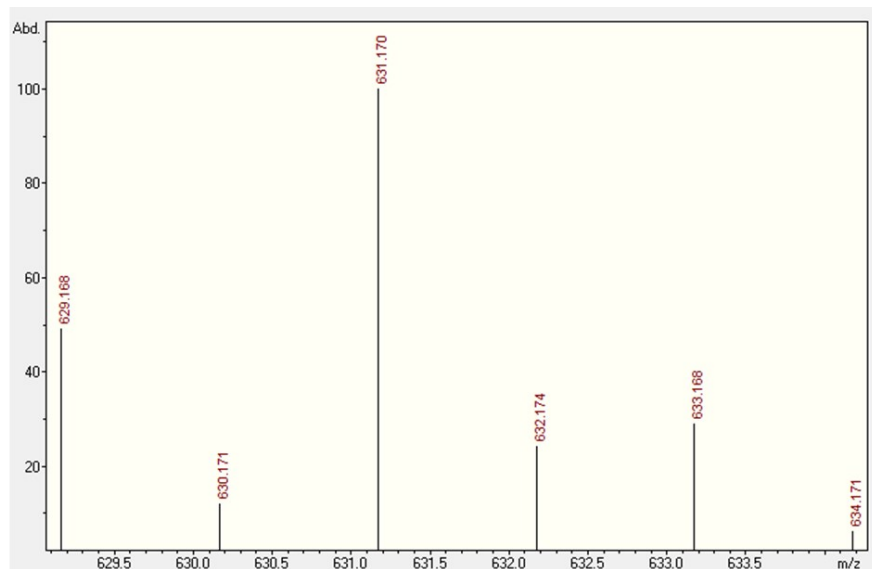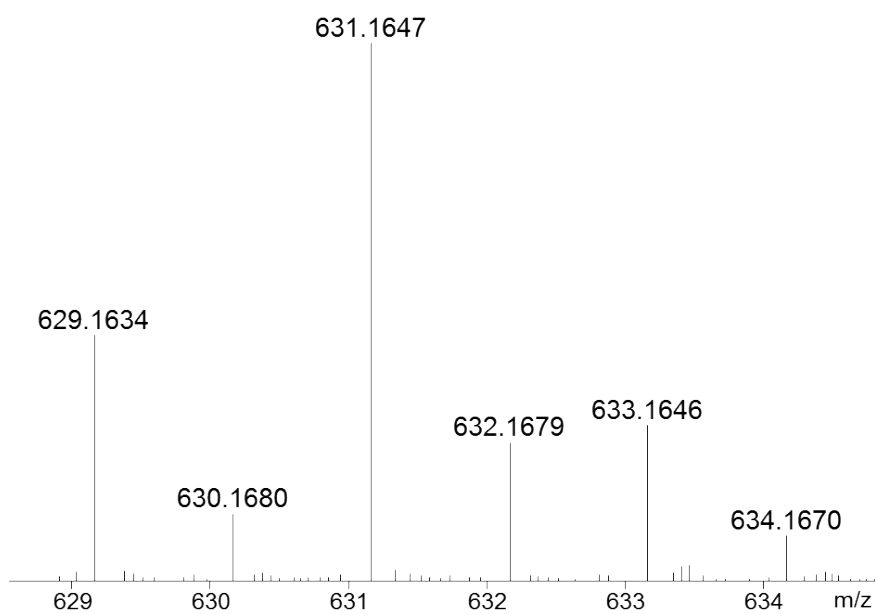

**Figure S29:** High-resolution ESI mass spectra of **5a**. Top: calculated spectrum. Bottom: experimental spectrum.

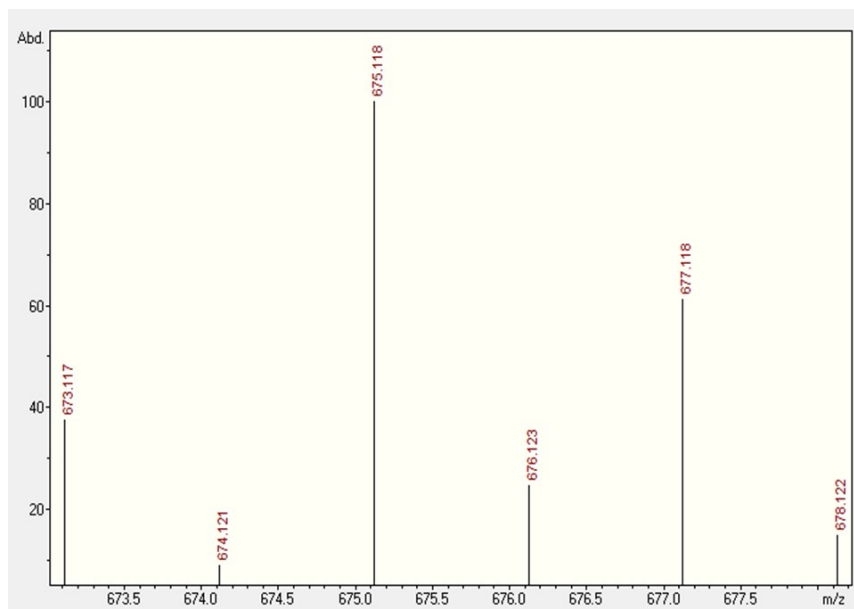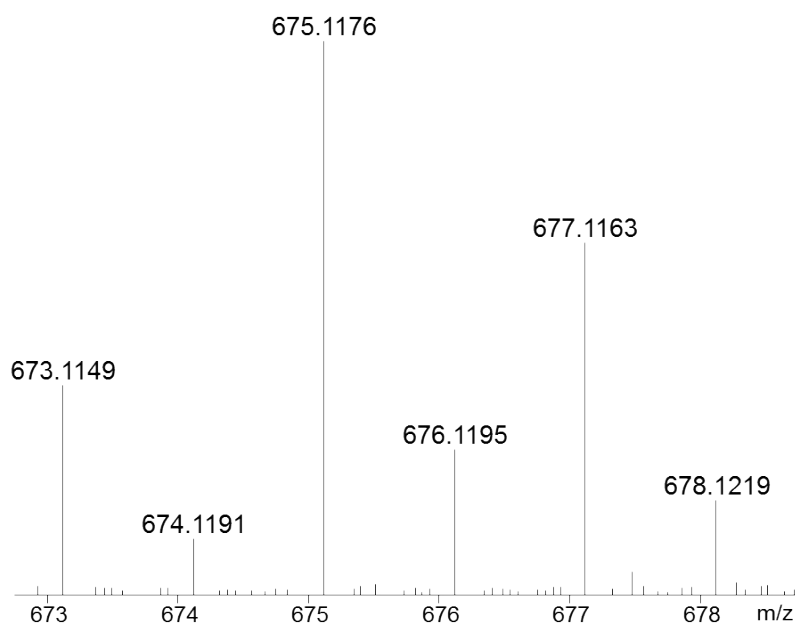

**Figure S30:** High-resolution ESI mass spectra of **5b**. Top: calculated spectrum. Bottom: experimental spectrum.

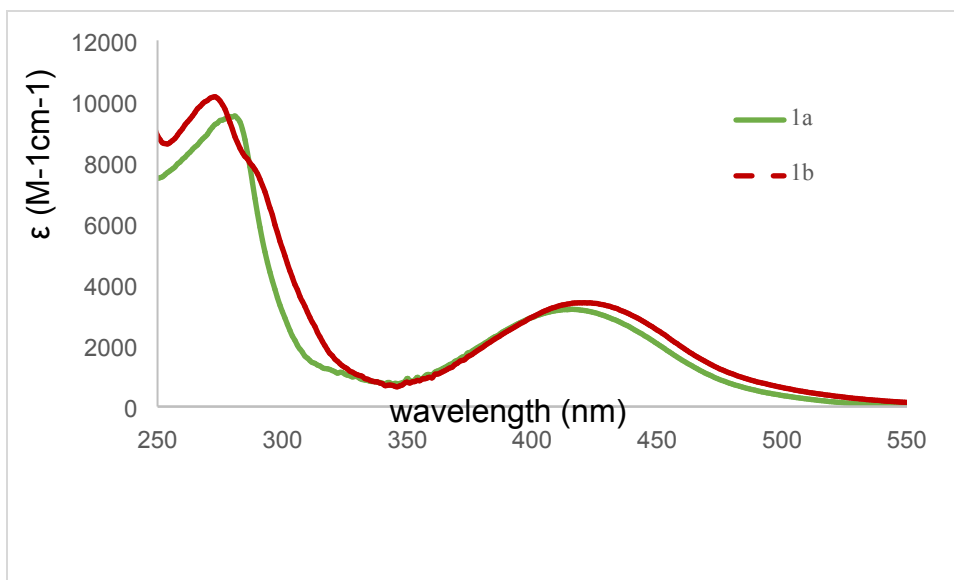

**Figure S31:** UV-visible spectra for compounds **1a** and **1b** in DCM.

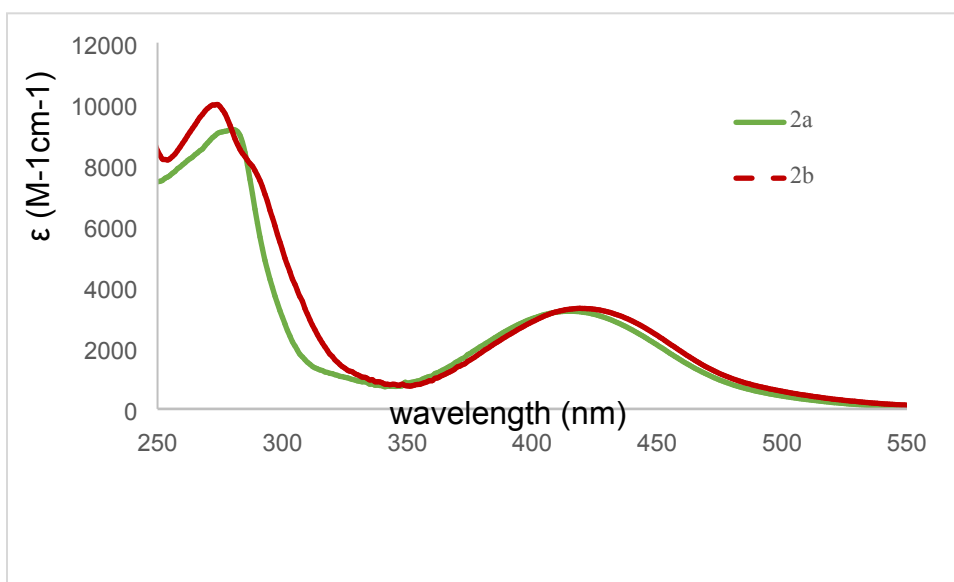

**Figure S32:** UV-visible spectra for compounds **2a** and **2b** in DCM.

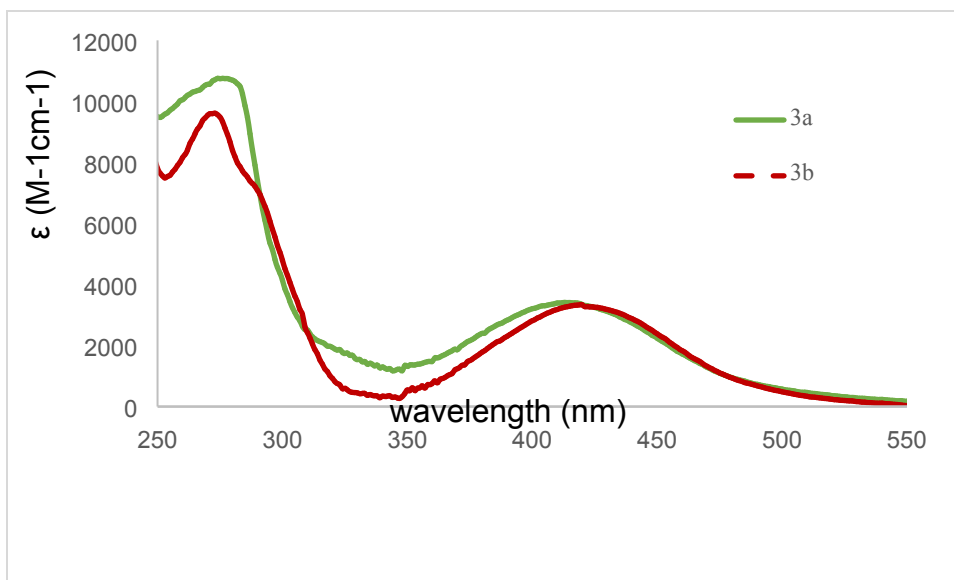

**Figure S33:** UV-visible spectra for compounds **3a** and **3b** in DCM.

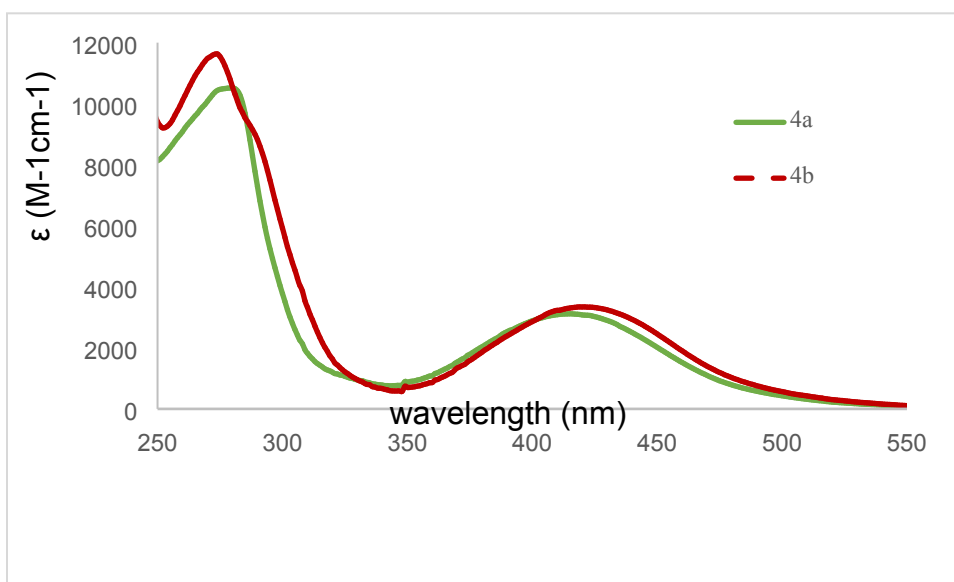

**Figure S34:** UV-visible spectra for compounds **4a** and **4b** in DCM.

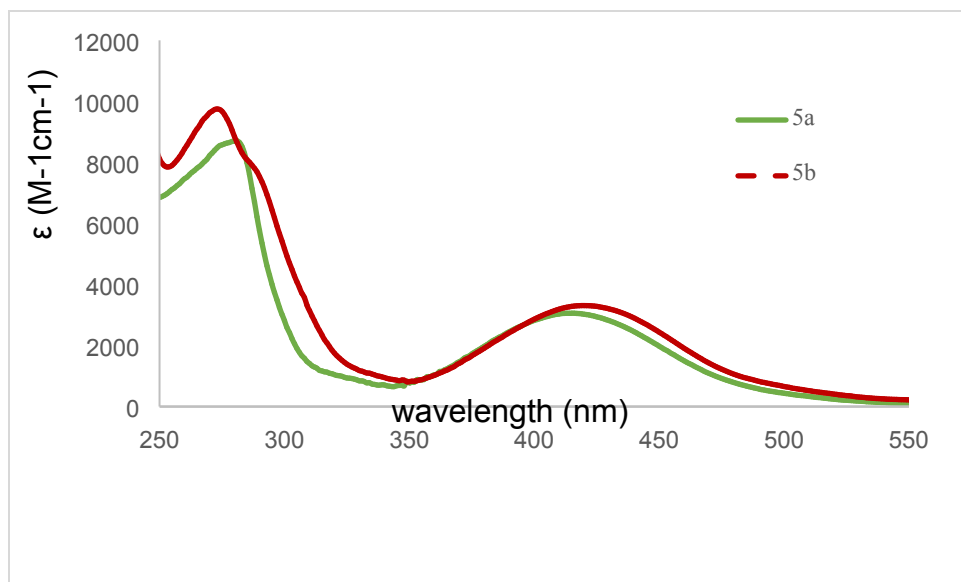

**Figure S35:** UV-visible spectra for compounds **5a** and **5b** in DCM.

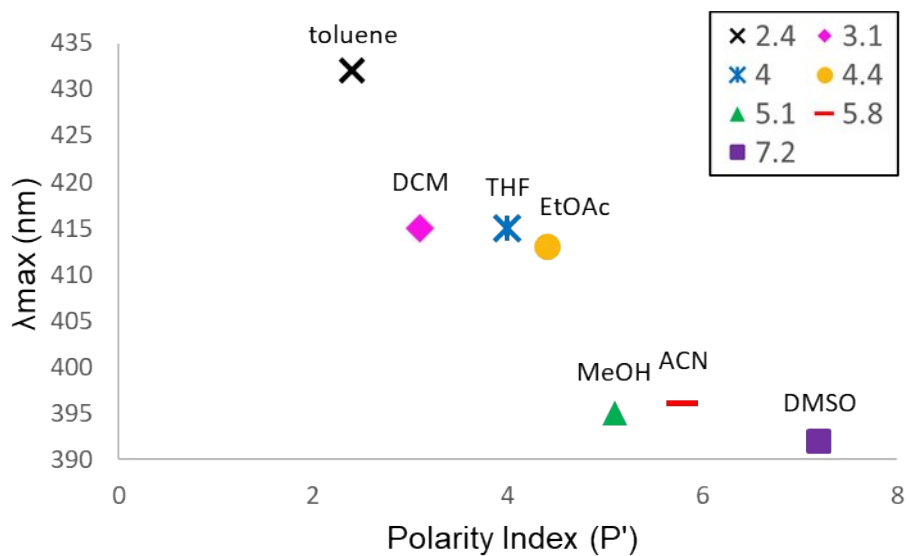

**Figure S36:** Solvent polarity index ( $P'$ ) versus  $\lambda_{\max}$  for **1a**.

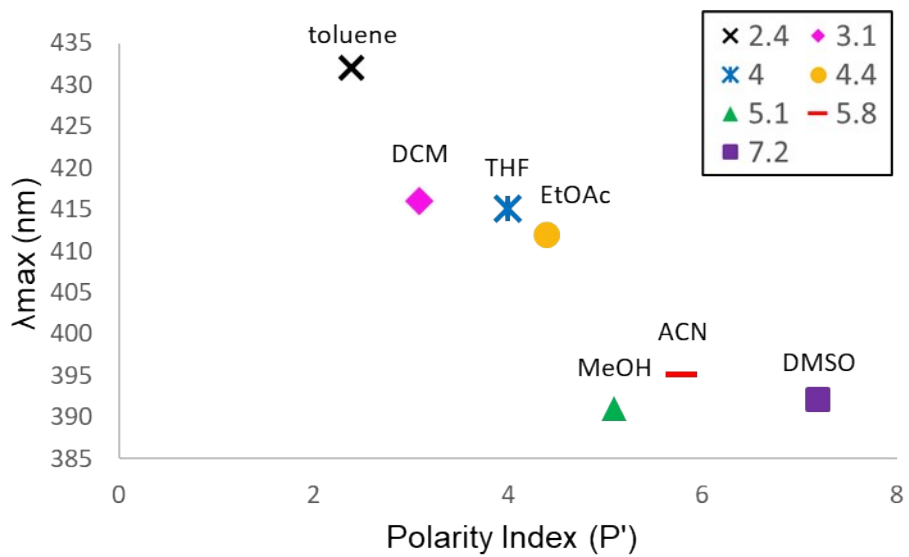

**Figure S37:** Solvent polarity index ( $P'$ ) versus  $\lambda_{\max}$  for **2a**.

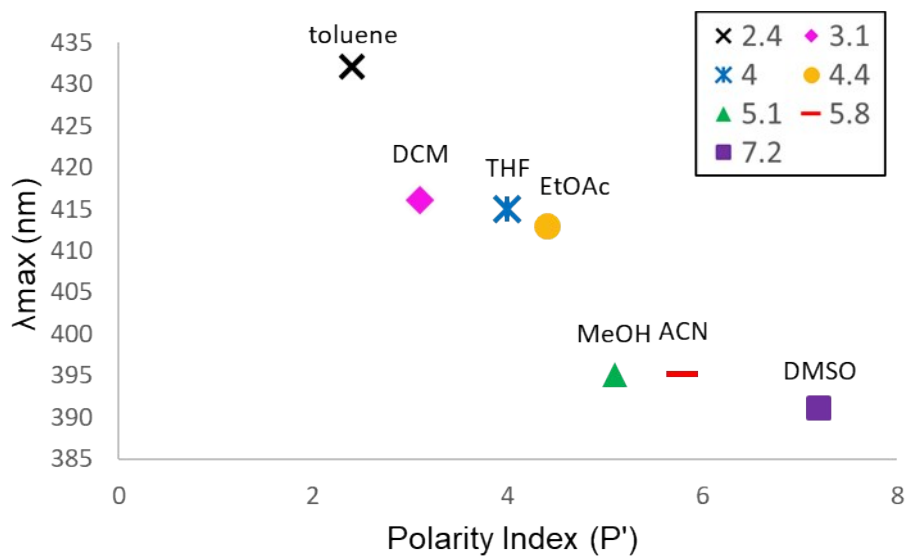

**Figure S38:** Solvent polarity index ( $P'$ ) versus  $\lambda_{\max}$  for **3a**.

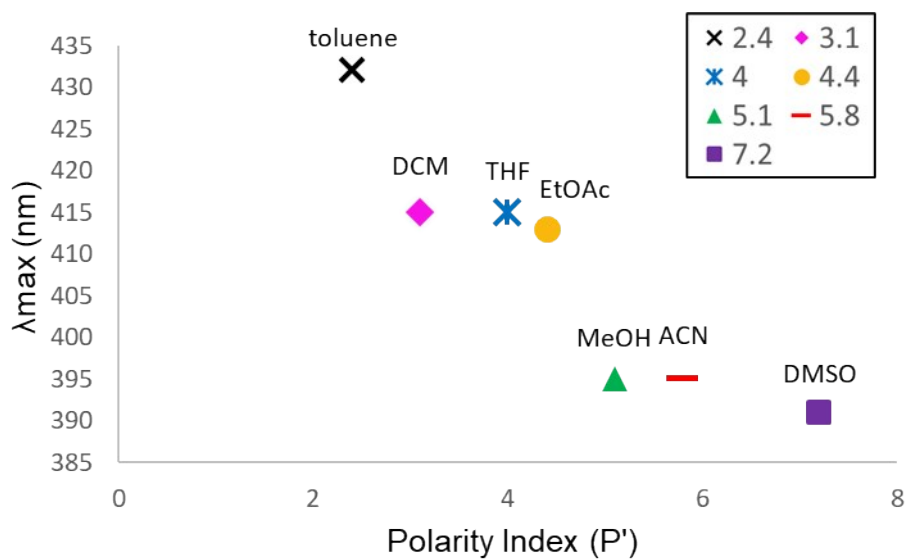

**Figure S39:** Solvent polarity index ( $P'$ ) versus  $\lambda_{\max}$  for **4a**.

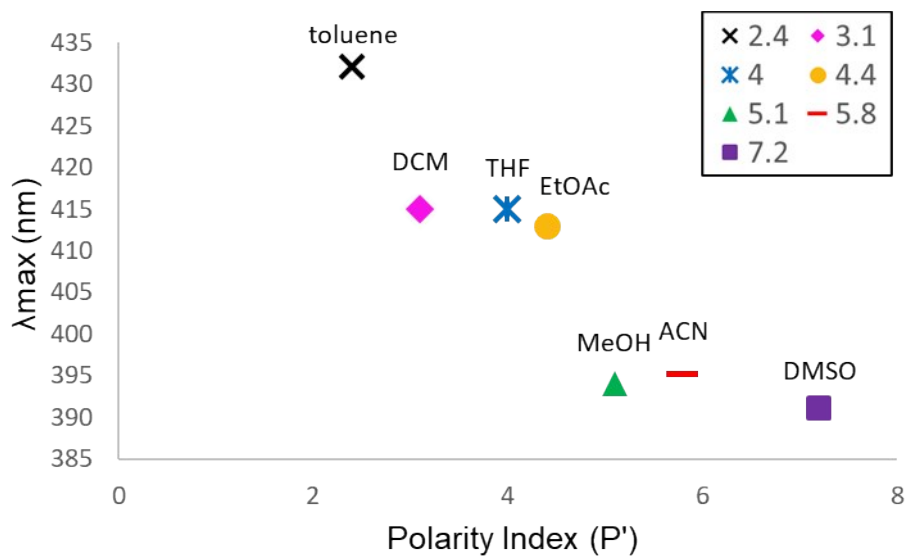

**Figure S40:** Solvent polarity index ( $P'$ ) versus  $\lambda_{\max}$  for **5a**.

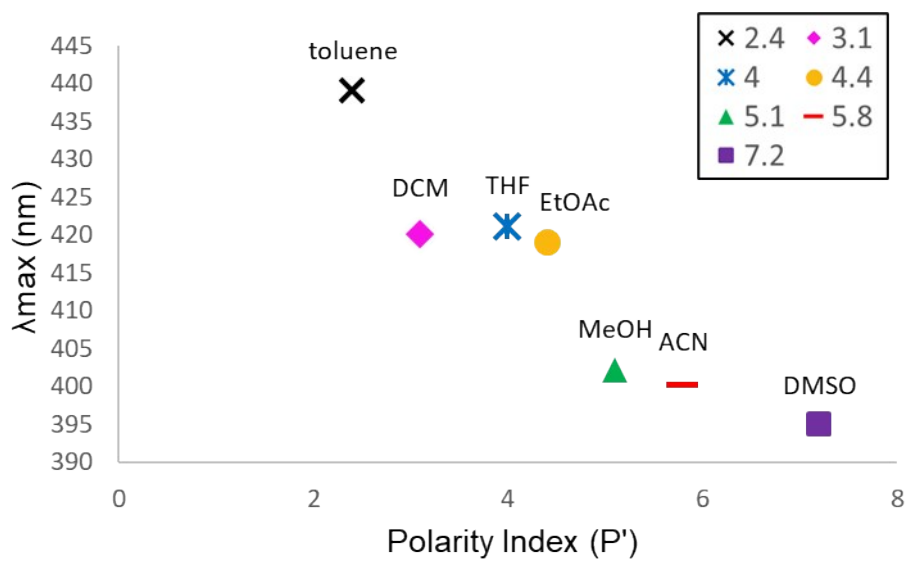

**Figure S41:** Solvent polarity index ( $P'$ ) versus  $\lambda_{\max}$  for **1b**.



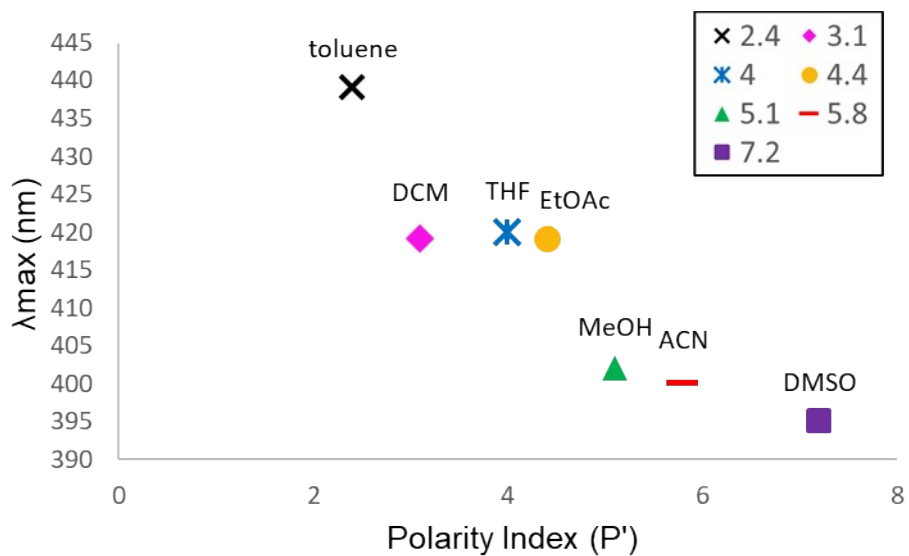

**Figure S42:** Solvent polarity index ( $P'$ ) versus  $\lambda_{\max}$  for **2b**.

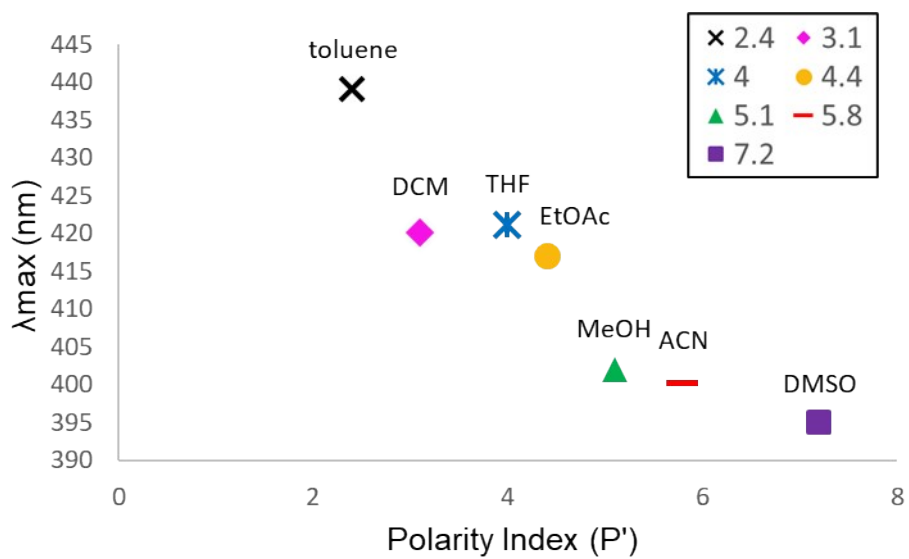

**Figure S43:** Solvent polarity index ( $P'$ ) versus  $\lambda_{\max}$  for **3b**.

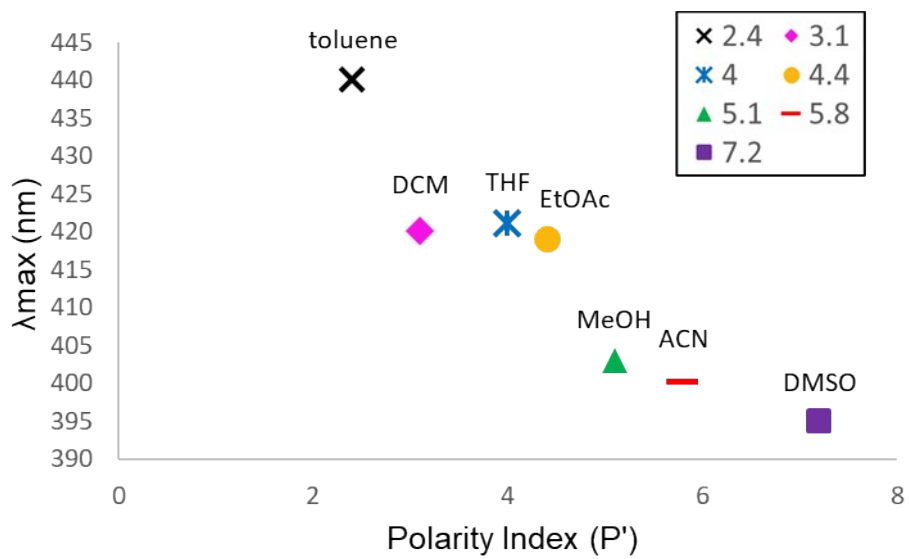

**Figure S44:** Solvent polarity index ( $P'$ ) versus  $\lambda_{\max}$  for **4b**.

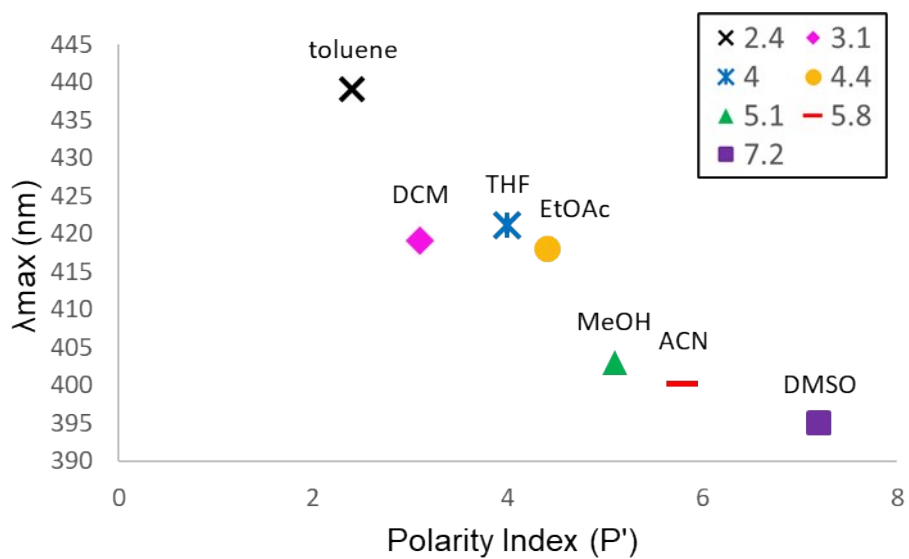

**Figure S45:** Solvent polarity index ( $P'$ ) versus  $\lambda_{\max}$  for **5b**.

Sample: 5Cl  
Size: 2.8400 mg  
Method: Heat/Cool/Heat  
Comment: 5Cl

DSC

File: E:\New folder (2)\5Cl1.001  
Operator: BS  
Run Date: 16-Jul-2020 09:19  
Instrument: DSC Q200 V24.11 Build 124

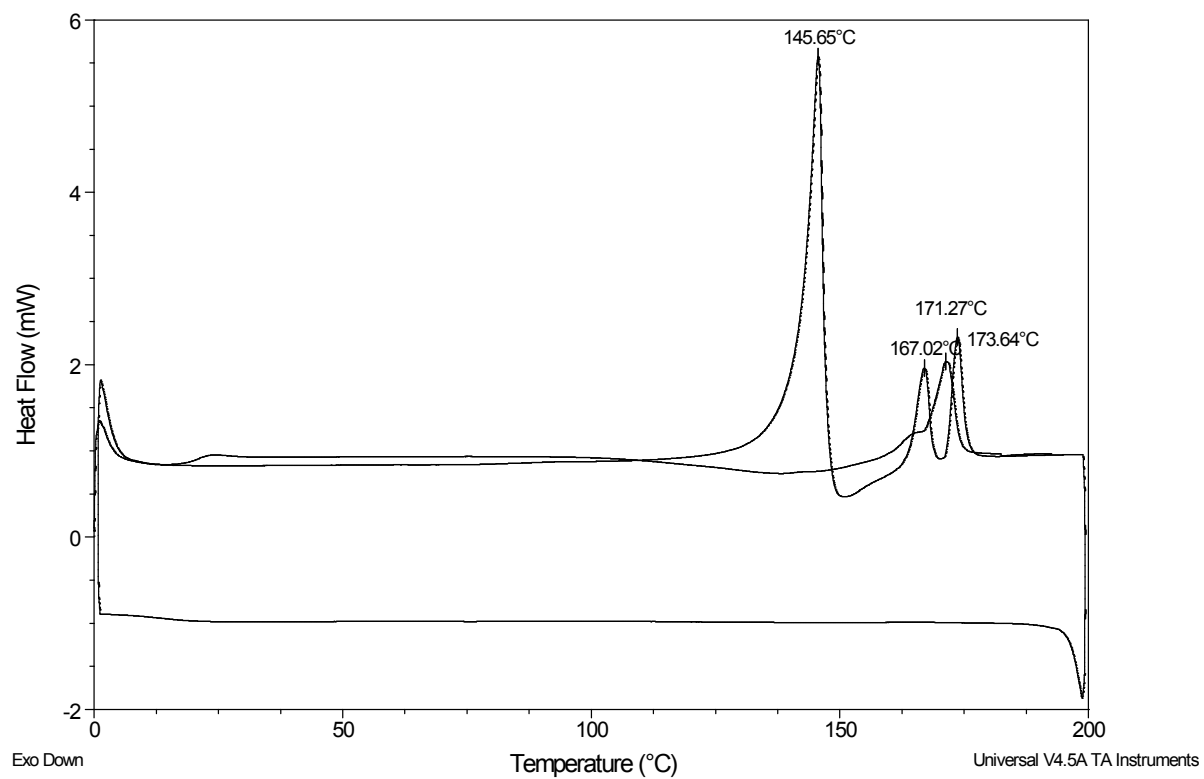

**Figure S46:** DSC thermogram for **1a**.

Sample: 5Br  
Size: 3.7900 mg  
Method: Heat/Cool/Heat  
Comment: 5Br

DSC

File: E:\New folder (2)\5Br.001  
Operator: BS  
Run Date: 16-Jul-2020 10:25  
Instrument: DSC Q200 V24.11 Build 124

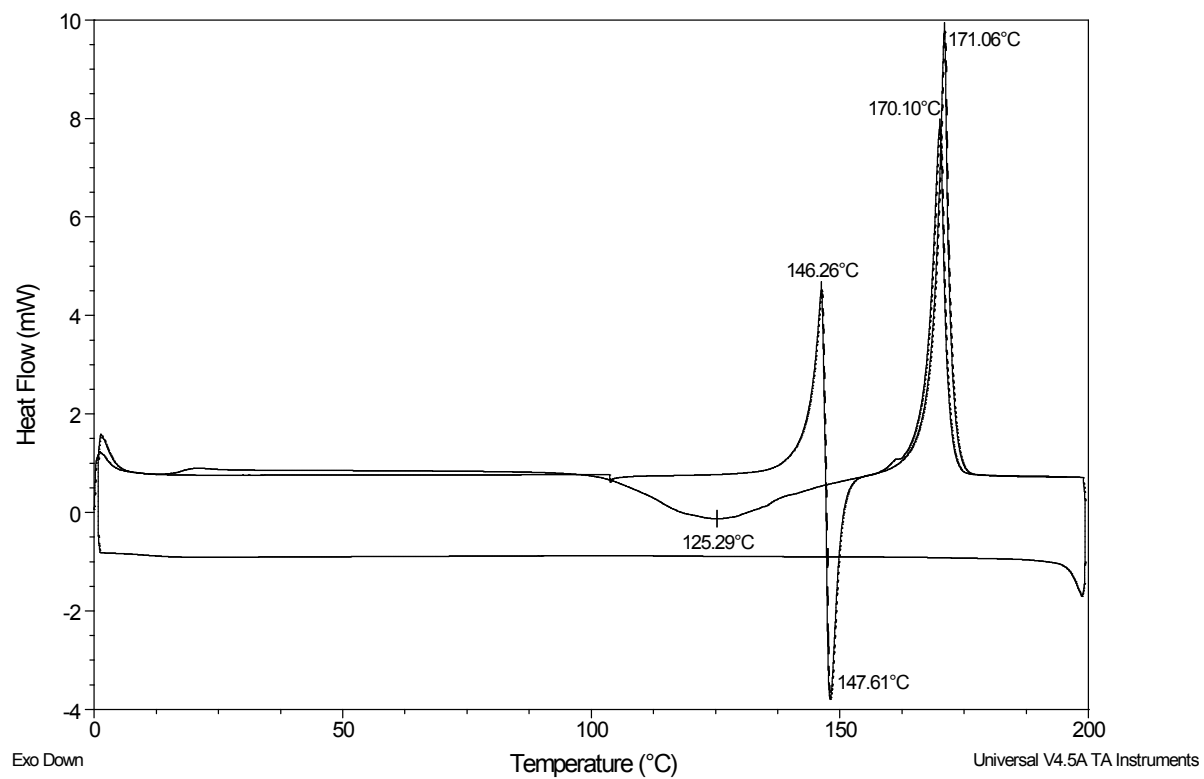

Figure S47: DSC thermogram of 1b.

Sample: 7Cl  
Size: 4.3000 mg  
Method: Heat/Cool/Heat  
Comment: 7Cl

DSC

File: E:\New folder (2)\7Cl.001  
Operator: BS  
Run Date: 17-Jul-2020 08:41  
Instrument: DSC Q200 V24.11 Build 124

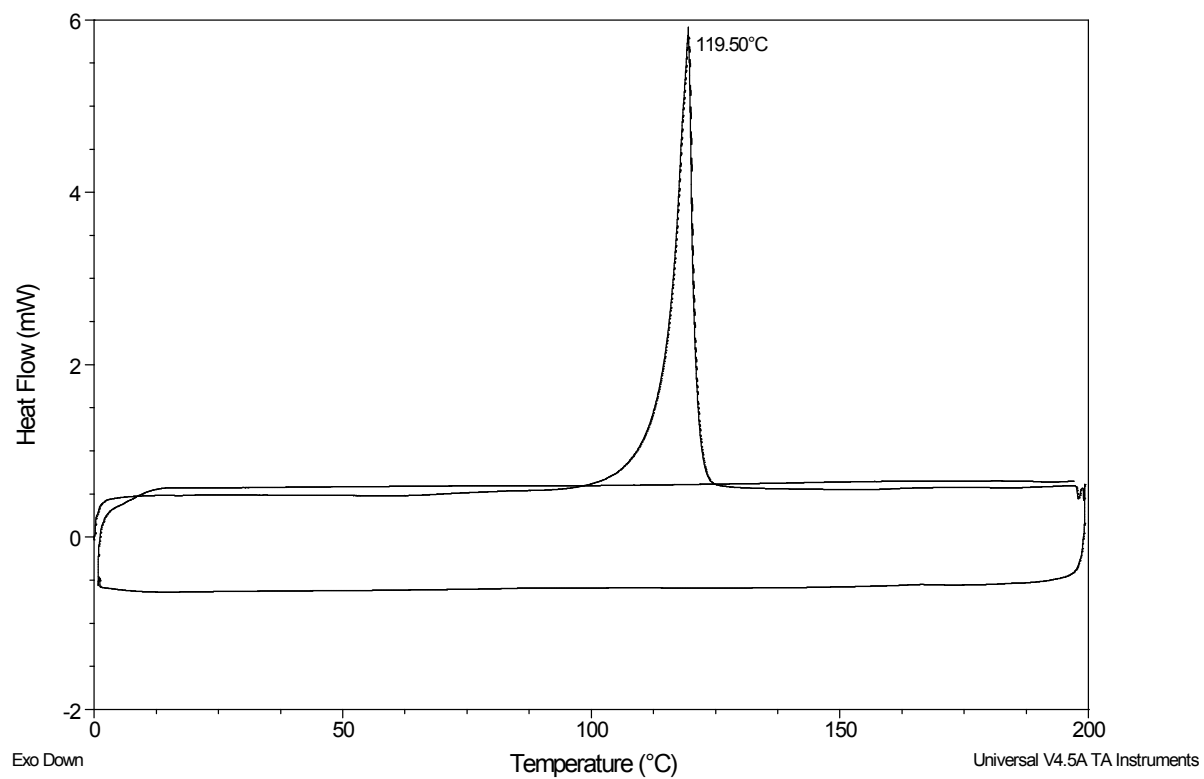

**Figure S48:** DSC thermogram of **2a**.

Sample: 7Br  
Size: 4.5400 mg  
Method: Heat/Cool/Heat  
Comment: 7Br

DSC

File: E:\New folder (2)\7Br.001  
Operator: BS  
Run Date: 17-Jul-2020 09:53  
Instrument: DSC Q200 V24.11 Build 124

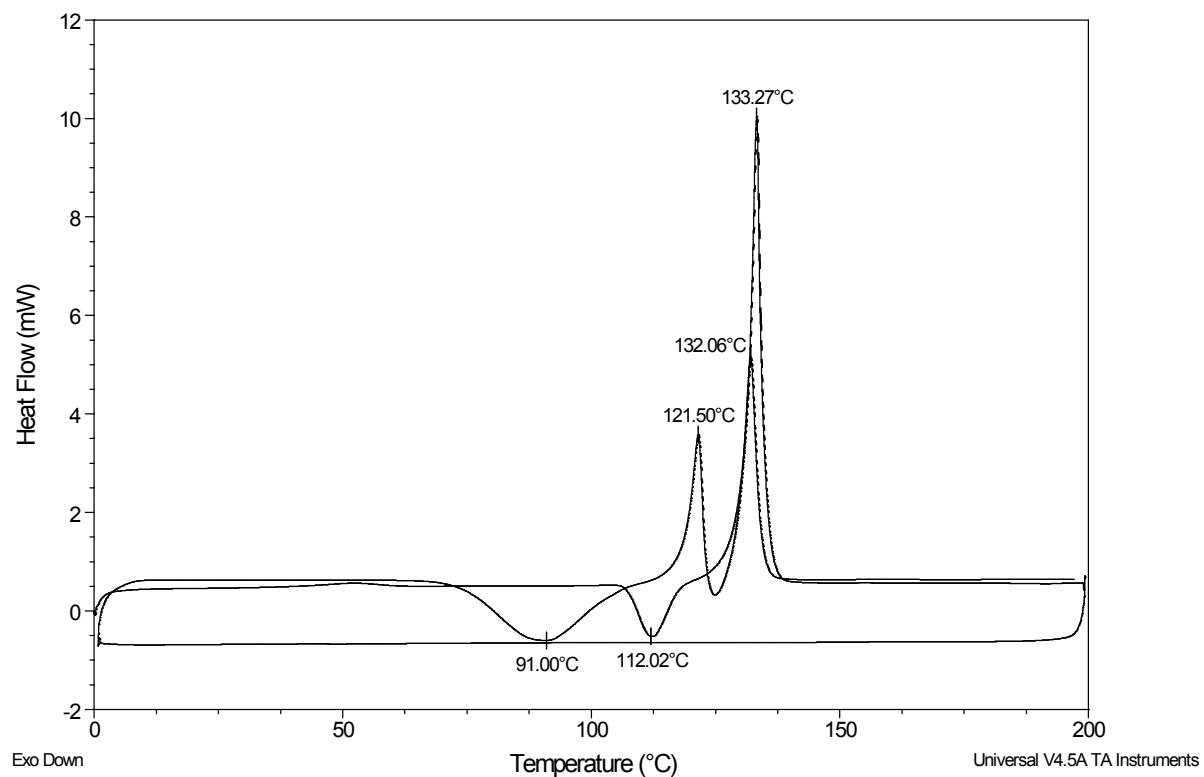

**Figure S49:** DSC thermogram of **2b**.

Sample: 11Cl  
Size: 3.9200 mg  
Method: Heat/Cool/Heat  
Comment: 11Cl

DSC

File: E:\New folder (2)\11d.001  
Operator: BS  
Run Date: 14-Jul-2020 15:30  
Instrument: DSC Q200 V24.11 Build 124

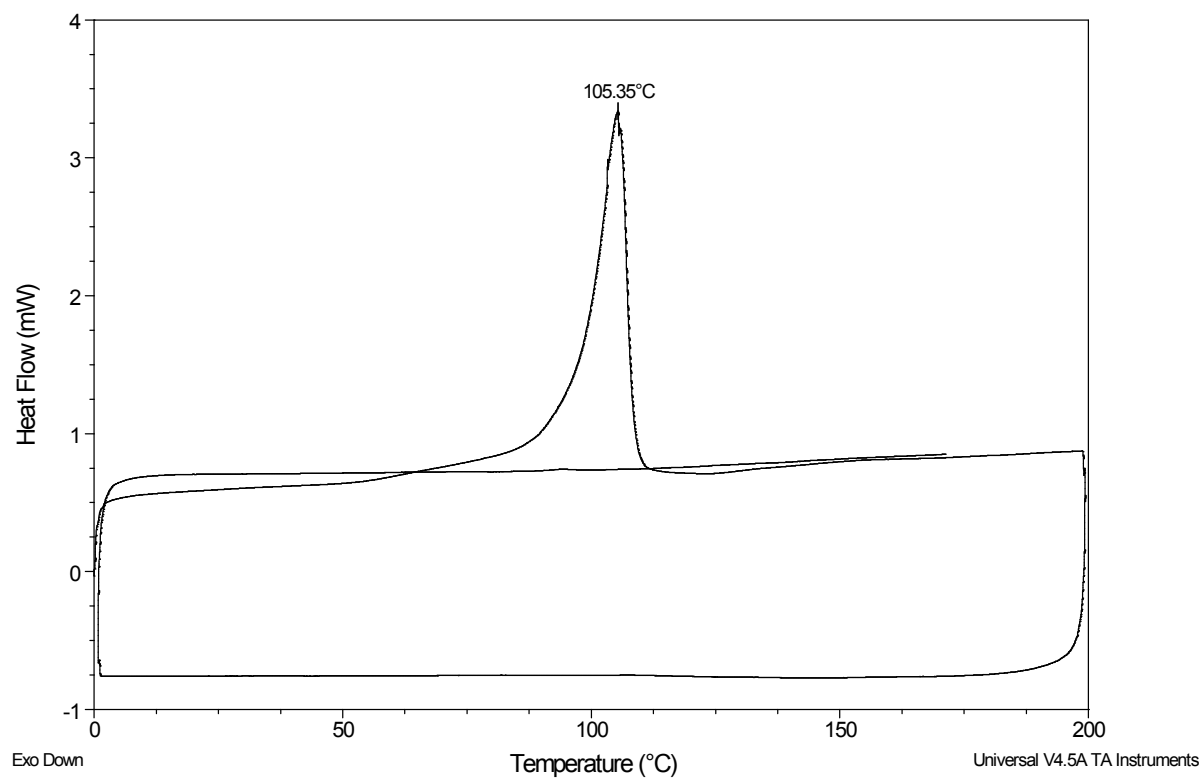

**Figure S50:** DSC thermogram of **3a**.

Sample: 11Br  
Size: 4.0300 mg  
Method: Heat/Cool/Heat  
Comment: 11Br

DSC

File: E:\New folder (2)\11Br.001  
Operator: BS  
Run Date: 14-Jul-2020 16:34  
Instrument: DSC Q200 V24.11 Build 124

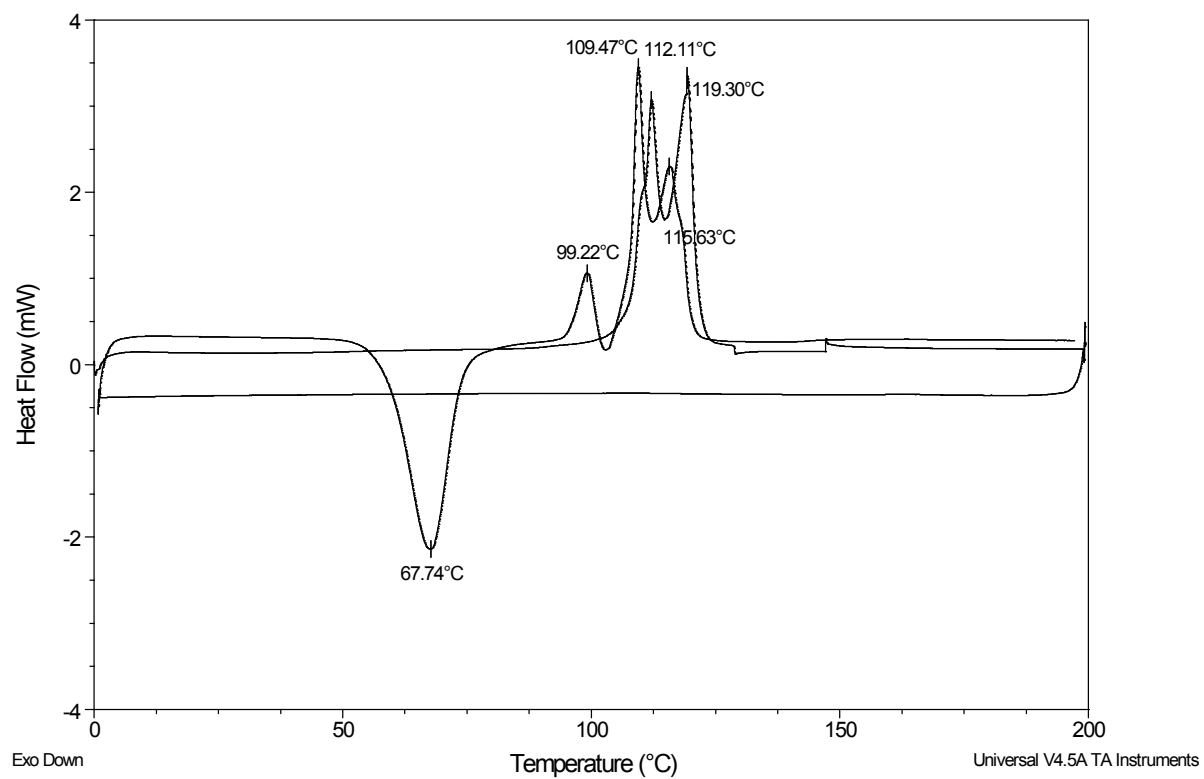

Figure S51: DSC thermogram of 3b.



Sample: 12Cl  
Size: 4.2600 mg  
Method: Heat/Cool/Heat  
Comment: 12Cl

DSC

File: E:\New folder (2)\12d1.001  
Operator: BS  
Run Date: 14-Jul-2020 14:21  
Instrument: DSC Q200 V24.11 Build 124

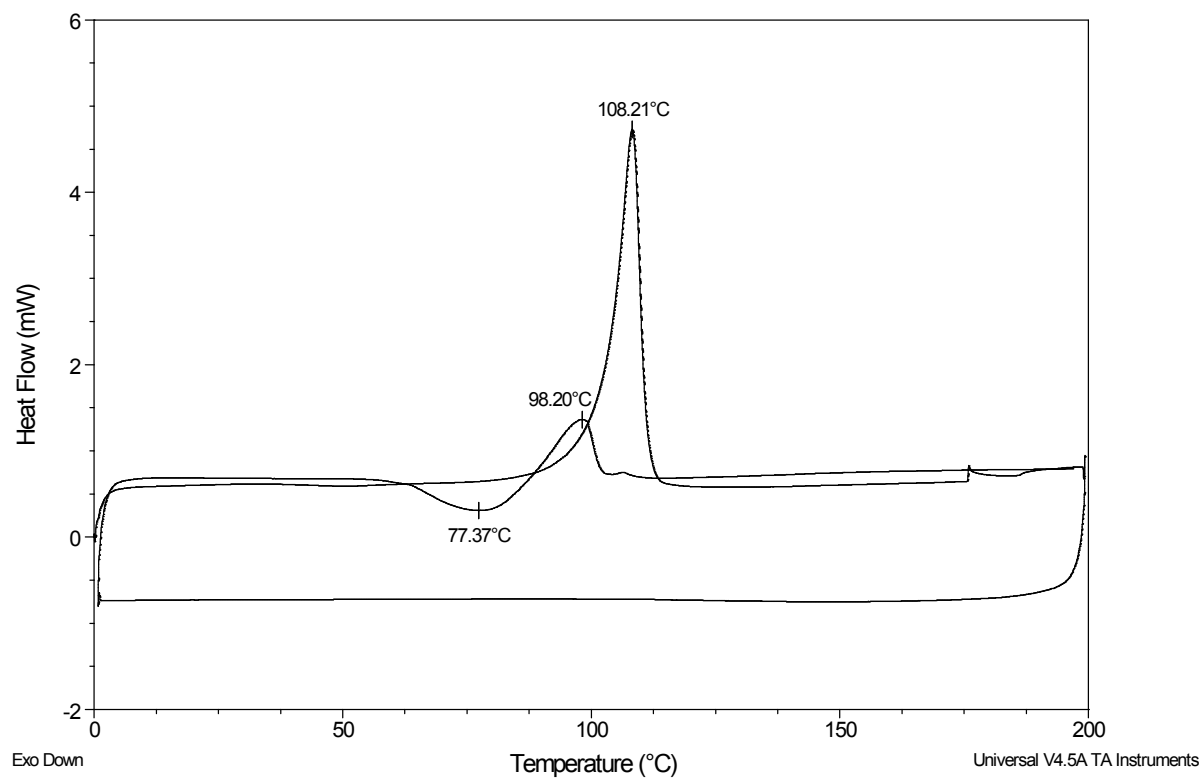

**Figure S52:** DSC thermogram of **4a**.

Sample: 12Br  
Size: 2.9600 mg  
Method: Heat/Cool/Heat  
Comment: 12Br

DSC

File: E:\New folder (2)\12Br1.001  
Operator: BS  
Run Date: 14-Jul-2020 13:15  
Instrument: DSC Q200 V24.11 Build 124

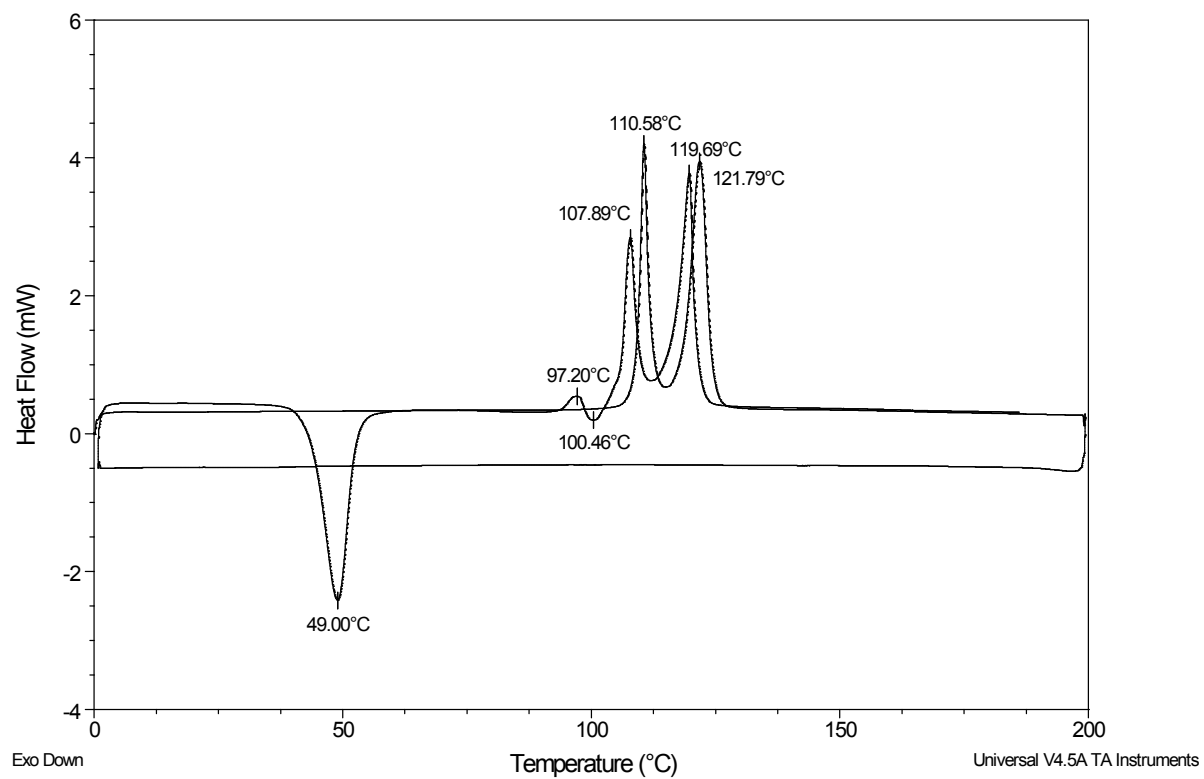

Figure S53: DSC thermogram of 4b.

Sample: 14Cl  
Size: 3.6700 mg  
Method: Heat/Cool/Heat  
Comment: 14Cl

DSC

File: E:\14Cl.001  
Operator: BS  
Run Date: 29-Jun-2020 14:31  
Instrument: DSC Q200 V24.11 Build 124

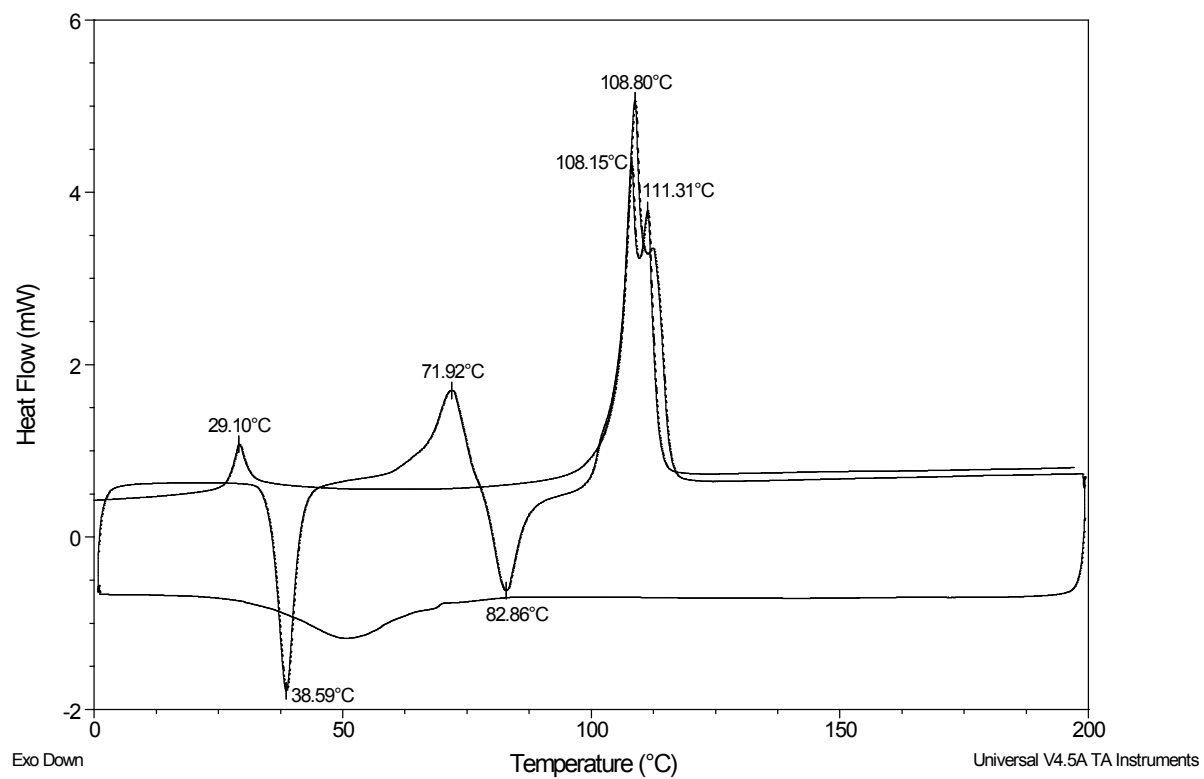

**Figure S54: DSC thermogram of 5a.**

Sample: 14Br  
Size: 4.7500 mg  
Method: Heat/Cool/Heat  
Comment: 14Br

DSC

File: E:\New folder (2)\14Br1.001  
Operator: BS  
Run Date: 14-Jul-2020 12:08  
Instrument: DSC Q200 V24.11 Build 124

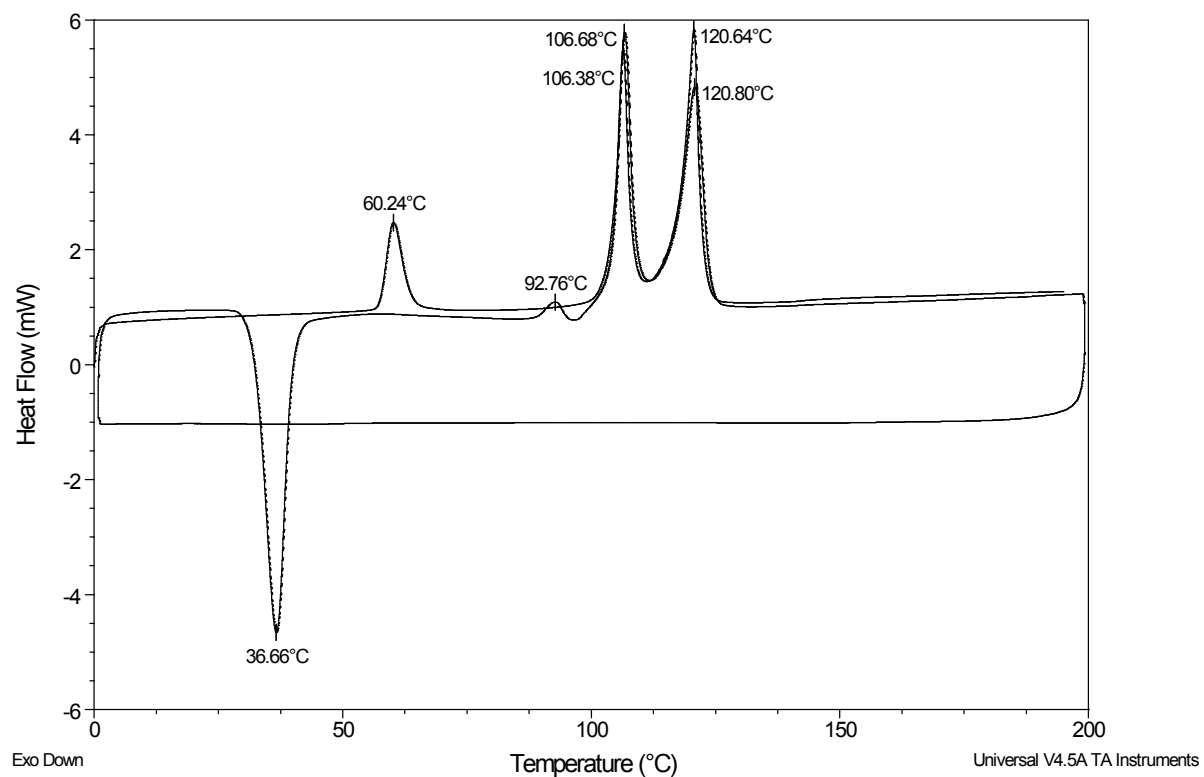

Figure S55: DSC thermogram of 5b.

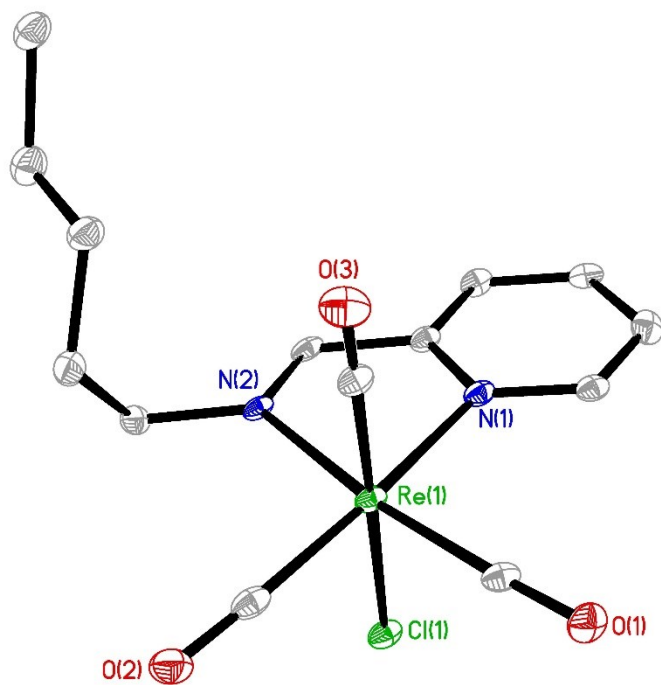

**Figure S56:** The structures of compound **1a** with 35% thermal ellipsoids. Hydrogen atoms have been omitted for clarity.

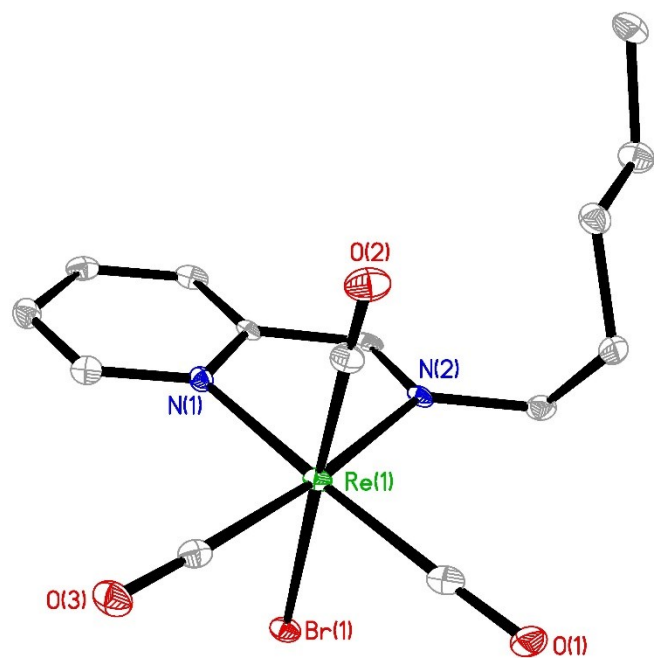

**Figure S57:** The structures of compound **1b** with 35% thermal ellipsoids. Hydrogen atoms have been omitted for clarity.

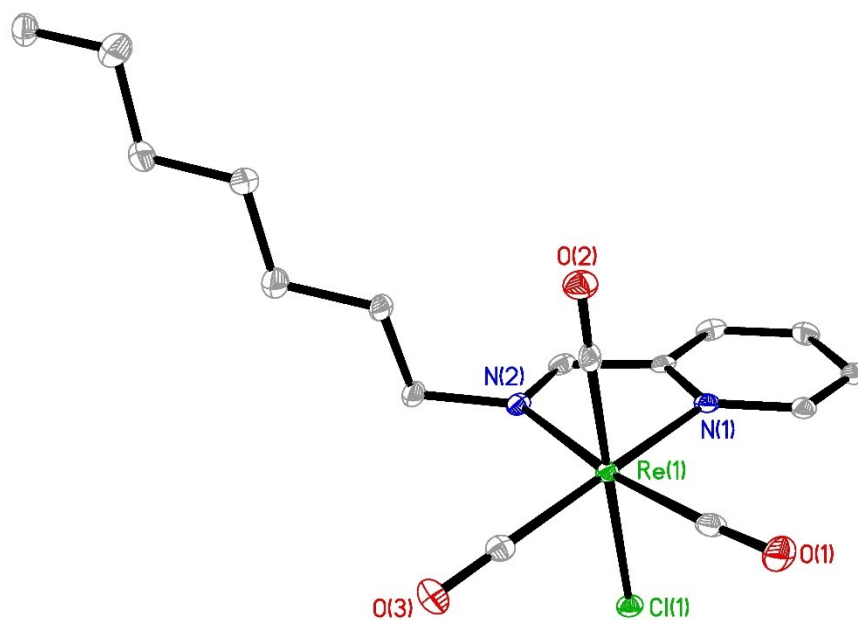

**Figure S58:** The structures of compound **2a** with 35% thermal ellipsoids. Hydrogen atoms have been omitted for clarity.

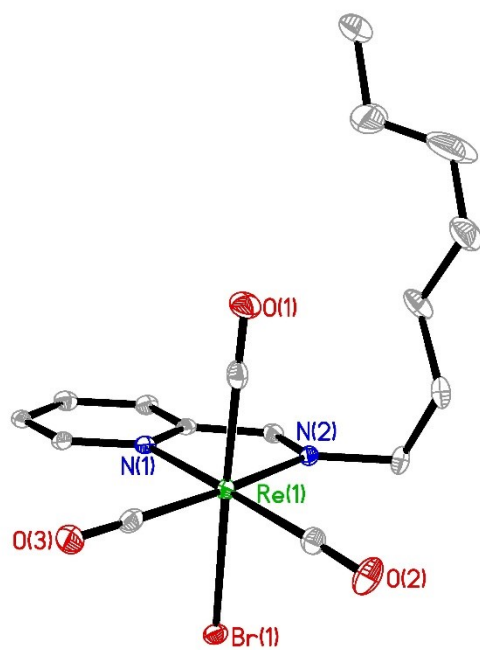

**Figure S59:** The structures of compound **2b** with 35% thermal ellipsoids. Hydrogen atoms have been omitted for clarity.



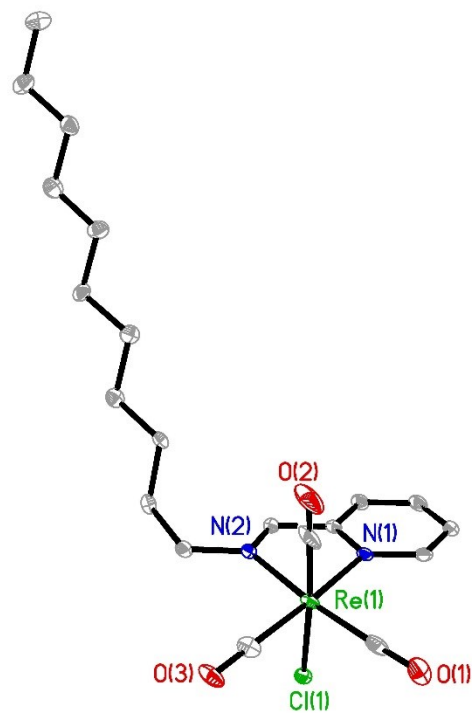

**Figure S60:** The structures of compound **3a** with 35% thermal ellipsoids. Hydrogen atoms have been omitted for clarity.

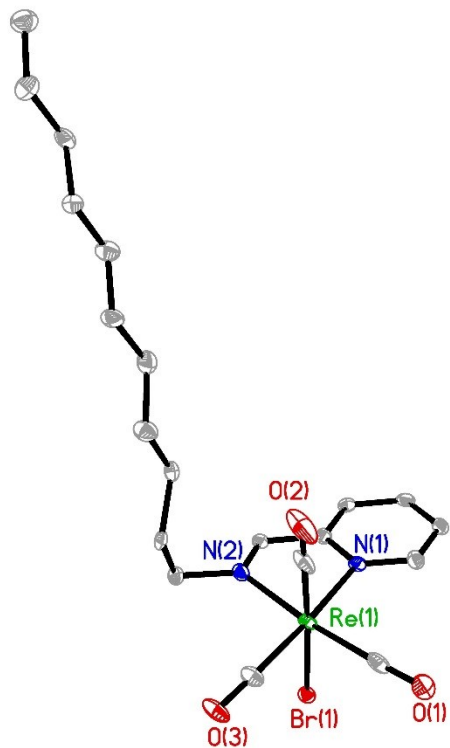

**Figure S61:** The structures of compound **3b** with 35% thermal ellipsoids. Hydrogen atoms have been omitted for clarity.

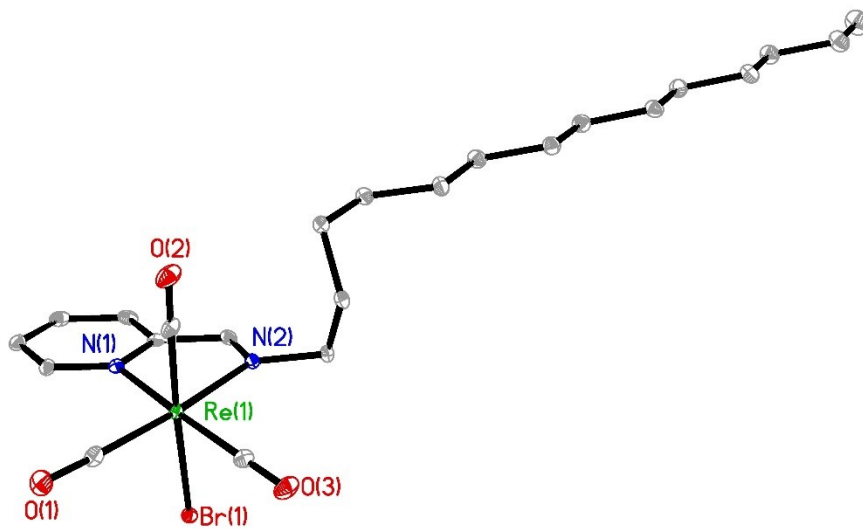

**Figure S62:** The structures of compound **5b** with 35% thermal ellipsoids. Hydrogen atoms have been omitted for clarity.

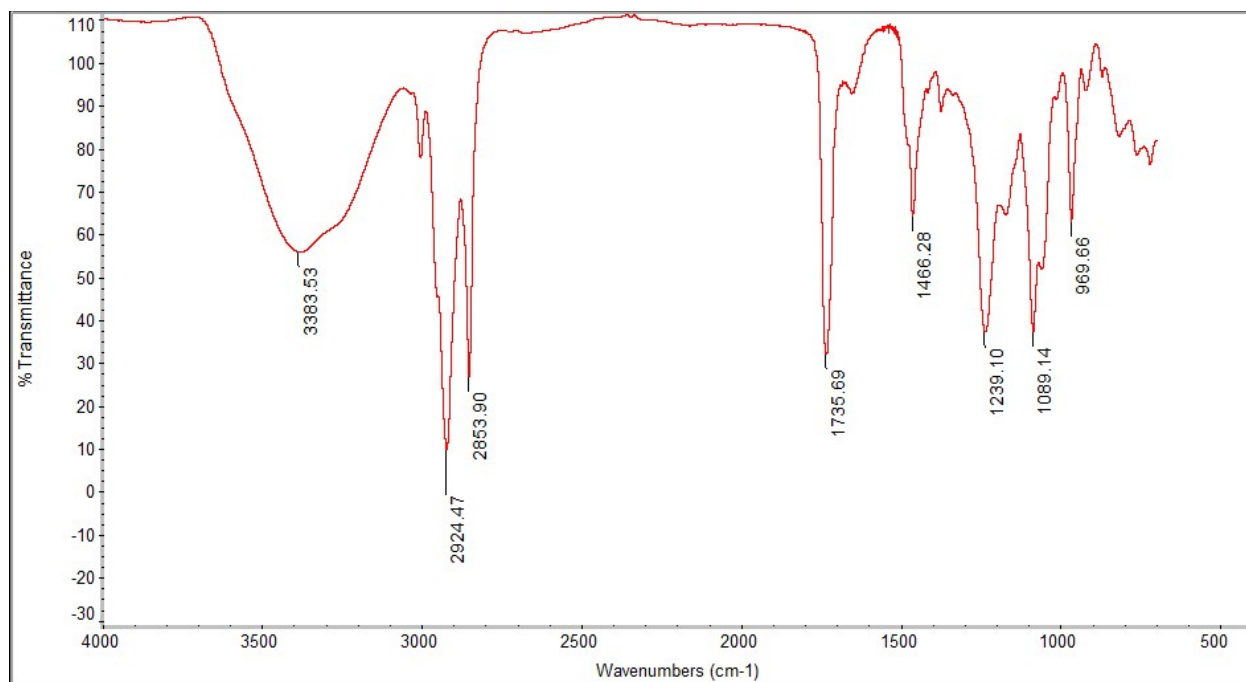

**Figure S63:** FTIR spectrum of 100 mol % DOPC vesicles.

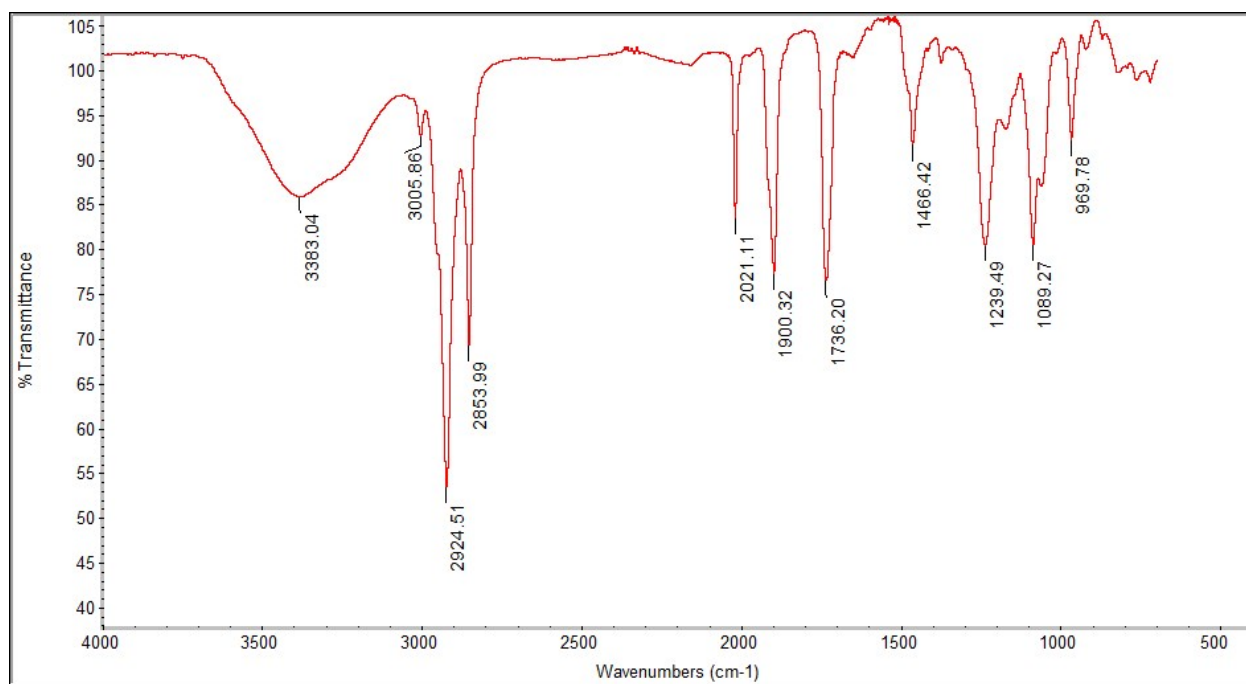

**Figure S64:** FTIR spectrum of 95 mol % DOPC, and 5 mol % by Re(I) content of compound 5a vesicles.

**Table S1:** X-ray crystal data and structure parameters for compounds **1a,b** and **2a,b**.

| <b>Compound</b>                                  | <b>1a</b>                                                          | <b>1b</b>                                                          | <b>2a</b>                                                          | <b>2b</b>                                                          |
|--------------------------------------------------|--------------------------------------------------------------------|--------------------------------------------------------------------|--------------------------------------------------------------------|--------------------------------------------------------------------|
| CCDC                                             | 2040147                                                            | 2040148                                                            | 2040149                                                            | 2040150                                                            |
| Empirical formula                                | C <sub>14</sub> H <sub>16</sub> ClN <sub>2</sub> O <sub>3</sub> Re | C <sub>14</sub> H <sub>16</sub> BrN <sub>2</sub> O <sub>3</sub> Re | C <sub>16</sub> H <sub>20</sub> ClN <sub>2</sub> O <sub>3</sub> Re | C <sub>16</sub> H <sub>20</sub> BrN <sub>2</sub> O <sub>3</sub> Re |
| Formula weight                                   | 481.94                                                             | 526.40                                                             | 509.99                                                             | 554.45                                                             |
| Crystal system                                   | Monoclinic                                                         | Monoclinic                                                         | Monoclinic                                                         | Monoclinic                                                         |
| Space group                                      | P2 <sub>1</sub> /c                                                 | P2 <sub>1</sub> /c                                                 | P2 <sub>1</sub> /c                                                 | C2/c                                                               |
| a/ Å                                             | 12.987(15)                                                         | 13.0993(5)                                                         | 14.1835(10)                                                        | 37.124(10)                                                         |
| b/ Å                                             | 9.232(11)                                                          | 9.2231(4)                                                          | 9.7002(7)                                                          | 8.127(2)                                                           |
| c/ Å                                             | 13.131(16)                                                         | 13.0735(5)                                                         | 12.7862(9)                                                         | 12.214(4)                                                          |
| α(°)                                             | 90                                                                 | 90                                                                 | 90                                                                 | 90                                                                 |
| β(°)                                             | 92.96(2)                                                           | 92.466(2)                                                          | 91.480(3)                                                          | 95.870(10)                                                         |
| γ(°)                                             | 90                                                                 | 90                                                                 | 90                                                                 | 90                                                                 |
| Volume (Å <sup>3</sup> )                         | 1572(3)                                                            | 1578.03(11)                                                        | 1758.6(2)                                                          | 3665.5(18)                                                         |
| Z                                                | 4                                                                  | 4                                                                  | 4                                                                  | 8                                                                  |
| Dc (Mg/m <sup>3</sup> )                          | 2.036                                                              | 2.216                                                              | 1.926                                                              | 2.009                                                              |
| μ (mm <sup>-1</sup> )                            | 7.909                                                              | 10.243                                                             | 7.076                                                              | 8.825                                                              |
| F(000)                                           | 920                                                                | 992                                                                | 984                                                                | 2112                                                               |
| reflns collected                                 | 14201                                                              | 14638                                                              | 16206                                                              | 34493                                                              |
| indep. reflns                                    | 3877                                                               | 3876                                                               | 4374                                                               | 4544                                                               |
| GOF on F <sup>2</sup>                            | 1.036                                                              | 1.011                                                              | 1.071                                                              | 1.041                                                              |
| R1 (on F <sub>o</sub> <sup>2</sup> , I > 2σ(I))  | 0.0322                                                             | 0.0323                                                             | 0.0275                                                             | 0.0215                                                             |
| wR2 (on F <sub>o</sub> <sup>2</sup> , I > 2σ(I)) | 0.0752                                                             | 0.0615                                                             | 0.0619                                                             | 0.0539                                                             |
| R1 (all data)                                    | 0.0426                                                             | 0.0452                                                             | 0.0397                                                             | 0.0260                                                             |
| wR2 (all data)                                   | 0.0797                                                             | 0.0665                                                             | 0.0810                                                             | 0.0550                                                             |

**Table S2:** X-ray crystal data and structure parameters for compounds **3a,b** and **5b**.

| <b>Compound</b>                                  | <b>3a</b>                                                                                     | <b>3b</b>                                                                                     | <b>5b</b>                                                          |
|--------------------------------------------------|-----------------------------------------------------------------------------------------------|-----------------------------------------------------------------------------------------------|--------------------------------------------------------------------|
| CCDC                                             | 2040151                                                                                       | 2040152                                                                                       | 2040153                                                            |
| Empirical formula                                | C <sub>40</sub> H <sub>56</sub> Cl <sub>2</sub> N <sub>4</sub> O <sub>6</sub> Re <sub>2</sub> | C <sub>40</sub> H <sub>56</sub> Br <sub>2</sub> N <sub>4</sub> O <sub>6</sub> Re <sub>2</sub> | C <sub>23</sub> H <sub>34</sub> BrN <sub>2</sub> O <sub>3</sub> Re |
| Formula weight                                   | 1132.18                                                                                       | 1221.10                                                                                       | 652.63                                                             |
| Crystal system                                   | Triclinic                                                                                     | Triclinic                                                                                     | Triclinic                                                          |
| Space group                                      | P-1                                                                                           | P-1                                                                                           | P-1                                                                |
| a/ Å                                             | 6.460(4)                                                                                      | 6.499(3)                                                                                      | 6.5604(5)                                                          |
| b/ Å                                             | 8.018(4)                                                                                      | 8.104(4)                                                                                      | 8.0273(5)                                                          |
| c/ Å                                             | 22.053(13)                                                                                    | 22.210(11)                                                                                    | 24.7618(19)                                                        |
| α(°)                                             | 84.53(3)                                                                                      | 87.49(4)                                                                                      | 96.463(3)                                                          |
| β(°)                                             | 85.03(3)                                                                                      | 82.67(3)                                                                                      | 94.773(3)                                                          |
| γ(°)                                             | 75.25(3)                                                                                      | 74.59(3)                                                                                      | 103.929(2)                                                         |
| Volume (Å <sup>3</sup> )                         | 1097.2(10)                                                                                    | 1118.4(9)                                                                                     | 1249.37(16)                                                        |
| Z                                                | 1                                                                                             | 1                                                                                             | 2                                                                  |
| Dc (Mg/m <sup>3</sup> )                          | 1.714                                                                                         | 1.813                                                                                         | 1.735                                                              |
| μ (mm <sup>-1</sup> )                            | 5.680                                                                                         | 7.240                                                                                         | 6.487                                                              |
| F(000)                                           | 556                                                                                           | 592                                                                                           | 640                                                                |
| reflns collected                                 | 48124                                                                                         | 42444                                                                                         | 61344                                                              |
| indep. reflns                                    | 5473                                                                                          | 5549                                                                                          | 6226                                                               |
| GOF on F <sup>2</sup>                            | 1.060                                                                                         | 1.068                                                                                         | 1.020                                                              |
| R1 (on F <sub>o</sub> <sup>2</sup> , I > 2σ(I))  | 0.0349                                                                                        | 0.0381                                                                                        | 0.0155                                                             |
| wR2 (on F <sub>o</sub> <sup>2</sup> , I > 2σ(I)) | 0.0807                                                                                        | 0.0665                                                                                        | 0.0373                                                             |
| R1 (all data)                                    | 0.0446                                                                                        | 0.0536                                                                                        | 0.0170                                                             |
| wR2 (all data)                                   | 0.0828                                                                                        | 0.0695                                                                                        | 0.0377                                                             |

|                             | <b>1a</b>                        | <b>1b</b>                        | <b>2a</b>                        | <b>2b</b>                        |
|-----------------------------|----------------------------------|----------------------------------|----------------------------------|----------------------------------|
| Re-N <sub>(imine)</sub> (Å) | 2.184(5)                         | 2.171(4)                         | 2.172(3)                         | 2.167(3)                         |
| Re-N <sub>(py)</sub> (Å)    | 2.166(5)                         | 2.161(4)                         | 2.175(4)                         | 2.174(3)                         |
| Re-C (Å)                    | 1.917(6)<br>1.930(6)<br>1.930(6) | 1.927(5)<br>1.908(5)<br>1.914(5) | 1.922(5)<br>1.899(5)<br>1.936(5) | 1.919(4)<br>1.928(3)<br>1.920(3) |
| C-O <sub>(c≡o)</sub> (Å)    | 1.161(6)<br>1.167(6)<br>1.159(7) | 1.147(6)<br>1.152(6)<br>1.158(5) | 1.151(6)<br>1.161(6)<br>1.146(5) | 1.137(4)<br>1.141(4)<br>1.148(4) |
| Re-X <sub>(Cl,Br)</sub> (Å) | 2.513(3)                         | 2.6196(5)                        | 2.4997(12)                       | 2.6264(7)                        |
| N-Re-N (°)                  | 74.65(15)                        | 74.68(14)                        | 74.72(14)                        | 74.85(10)                        |

**Table S3:** Selected bond lengths and angles for compounds **1a,b** and **2a,b**.

**Table S4:** Selected bond lengths and angles for compounds **3a**, **b**, and **5b**.

|                             | <b>3a</b>                        | <b>3b</b>                        | <b>5b</b>                        |
|-----------------------------|----------------------------------|----------------------------------|----------------------------------|
| Re-N <sub>(imine)</sub> (Å) | 2.161(4)                         | 2.152(5)                         | 2.1609(16)                       |
| Re-N <sub>(py)</sub> (Å)    | 2.181(4)                         | 2.180(4)                         | 2.1726(16)                       |
| Re-C (Å)                    | 1.930(6)<br>1.914(6)<br>1.932(5) | 1.908(7)<br>1.900(6)<br>1.917(6) | 1.920(2)<br>1.910(2)<br>1.926(2) |
| C-O <sub>(c≡o)</sub> (Å)    | 1.148(7)<br>1.142(7)<br>1.136(6) | 1.162(7)<br>1.169(7)<br>1.151(6) | 1.150(3)<br>1.146(3)<br>1.148(3) |
| Re-X <sub>(Cl,Br)</sub> (Å) | 2.4713(17)                       | 2.6174(13)                       | 2.6226(3)                        |
| N-Re-N (°)                  | 74.67(15)                        | 74.90(16)                        | 74.80(6)                         |
